# Supplementary material for: Magneto–structural maps and bridged-ligand effect for dichloro-bridged dinuclear copper(ii) complexes: a theoretical perspective
Source: Royal Society of Chemistry journal article supplement (doi:10.1039/d3ra00585b), 2023-01-01
Supplement: d3ra00585b1.pdf [file d3ra00585b1.pdf]

## Magneto-structural maps and bridged-ligand effect for dichloro-bridged dinuclear Copper(II) complexes: A theoretical perspective

Shuchang Luo,<sup>\*a,b</sup> Xianwei Shen<sup>a</sup>, Peng Gao<sup>a</sup>, Ting Tu<sup>a</sup> and Xiaoyuan Sun<sup>\*a</sup>

<sup>a</sup> College of Chemical Engineering, Guizhou University of Engineering Science, Bijie 551700, People's Republic of China; The coal chemical engineering 2011 Collaborative Innovation Center of Guizhou province, Bijie 551700, People's Republic of China

<sup>b</sup> Guizhou Province Key Laboratory of Ecological Protection and Restoration of Typical Plateau Wetlands, Bijie 551700, People's Republic of China

Table S1. Structural and magnetic coupling constant for some di- $\mu$ -chloro-bridged binuclear Cu(II) complexes<sup>[25,26]</sup>.

| Complex                                                                                   | $\alpha(\text{Cu}-\mu\text{-Cl}-\text{Cu})[^\circ]$ | $R_{\text{Cu-Cl}}[\text{\AA}]$ | $R_0(\text{Cu}\cdots\text{Cu})[\text{\AA}]$ | $\alpha/R_{\text{Cu-Cl}}[^\circ/\text{\AA}]$ | $J[\text{cm}^{-1}]$ |
|-------------------------------------------------------------------------------------------|-----------------------------------------------------|--------------------------------|---------------------------------------------|----------------------------------------------|---------------------|
| [Cu(TMSO) <sub>2</sub> Cl <sub>2</sub> ] <sub>2</sub>                                     | 88.50                                               | 2.28                           | 3.02                                        | 38.82                                        | -16.00              |
| [Cu <sub>2</sub> (dpt) <sub>2</sub> Cl <sub>2</sub> ](Cl) <sub>2</sub>                    | 91.40                                               | 2.55                           | 3.55                                        | 35.91                                        | 85.90               |
| [Cu(2-methylpyridine) <sub>2</sub> Cl <sub>2</sub> ] <sub>2</sub>                         | 100.63                                              | 2.29                           | 3.36                                        | 44.00                                        | -7.40               |
| [Cu(HL)Cl] <sub>2</sub> ·H <sub>2</sub> O                                                 | 84.66                                               | 2.67                           | 3.34                                        | 31.73                                        | 43.20               |
| [Cu(apyhist)Cl] <sub>2</sub> (ClO <sub>4</sub> ) <sub>2</sub>                             | 87.46                                               | 2.27                           | 2.74                                        | 38.51                                        | -3.09               |
| [Cu(pmpe)Cl] <sub>2</sub>                                                                 | 89.31                                               | 2.30                           | 2.77                                        | 38.86                                        | -4.54               |
| [Cu(pdon)Cl] <sub>2</sub> ·2DMF                                                           | 87.66                                               | 2.27                           | 2.69                                        | 38.70                                        | -1.16               |
| [Cu(dmgl)Cl] <sub>2</sub>                                                                 | 88.00                                               | 2.24                           | 2.70                                        | 39.32                                        | 0.62                |
| [Cu(dbea)Cl] <sub>2</sub>                                                                 | 87.10                                               | 2.30                           | 2.74                                        | 37.90                                        | 5.00                |
| [Cu(pzPh)(opo)Cl] <sub>2</sub>                                                            | 93.60                                               | 2.29                           | 2.83                                        | 40.89                                        | 8.72                |
| [Cu(iydio)Cl] <sub>2</sub> (ClO <sub>4</sub> ) <sub>2</sub>                               | 88.81                                               | 2.32                           | 2.66                                        | 38.20                                        | 1.16                |
| [Cu(dien)Cl] <sub>2</sub> (ClO <sub>4</sub> ) <sub>2</sub>                                | 92.00                                               | 2.31                           | 2.77                                        | 39.78                                        | 0.40                |
| [Cu(Hfsaaep)Cl] <sub>2</sub>                                                              | 92.10                                               | 2.23                           | 2.74                                        | 41.37                                        | 0.40                |
| [Cu(Hfsaaep)Cl] <sub>2</sub>                                                              | 95.27                                               | 2.31                           | 2.85                                        | 41.28                                        | 0.30                |
| [Cu(bpdio)Cl] <sub>2</sub>                                                                | 96.68                                               | 2.27                           | 2.84                                        | 42.53                                        | 4.87                |
| [Cu(pmdio)Cl] <sub>2</sub> (ClO <sub>4</sub> ) <sub>2</sub>                               | 88.20                                               | 2.29                           | 2.58                                        | 38.50                                        | 2.28                |
| [Cu(2,2-dimethylaziridine) <sub>2</sub> Cl <sub>2</sub> ] <sub>2</sub>                    | 93.14                                               | 2.35                           | 2.68                                        | 39.68                                        | -3.70               |
| [Cu(aamo)Cl] <sub>2</sub>                                                                 | 82.90                                               | 2.33                           | 2.81                                        | 35.59                                        | 12.00               |
| [Cu(L1)Cl] <sub>2</sub> ·H <sub>2</sub> O (2)                                             | 88.47                                               | 2.30                           | 2.71                                        | 38.42                                        | -1.40               |
| [Cu(L1)Cl] <sub>2</sub> ·H <sub>2</sub> O (2)                                             | 84.79                                               | 2.29                           | 2.66                                        | 37.03                                        | -1.40               |
| [Cu(pbpe)Cl] <sub>2</sub> (ClO <sub>4</sub> ) <sub>2</sub>                                | 88.09                                               | 2.29                           | 2.73                                        | 38.53                                        | 6.00                |
| [Cu <sub>2</sub> (L3) <sub>2</sub> Cl <sub>2</sub> ] <sub>n</sub> ·3nH <sub>2</sub> O (6) | 85.61                                               | 2.29                           | 2.65                                        | 37.47                                        | 4.95                |
| [Cu(Hbpmdio)Cl] <sub>2</sub> (ClO <sub>4</sub> ) <sub>2</sub>                             | 94.70                                               | 2.29                           | 2.92                                        | 41.32                                        | 10.70               |
| [Cu <sub>2</sub> (pmdip) <sub>2</sub> Cl <sub>2</sub> ](ClO <sub>4</sub> ) <sub>2</sub>   | 86.44                                               | 2.28                           | 2.64                                        | 37.91                                        | -1.95               |
| [{Cu(terpy)Cl} <sub>2</sub> ](PF <sub>6</sub> ) <sub>2</sub>                              | 89.90                                               | 2.22                           | 2.72                                        | 40.53                                        | -5.90               |
| [Cu(HL2)Cl] <sub>2</sub> ·2DMF (3)                                                        | 86.76                                               | 2.28                           | 2.63                                        | 38.10                                        | -4.00               |
| [Cu(mebta) <sub>2</sub> Cl] <sub>2</sub>                                                  | 88.10                                               | 2.30                           | 2.63                                        | 38.27                                        | 6.70                |

|                                                                                               |       |      |      |       |        |
|-----------------------------------------------------------------------------------------------|-------|------|------|-------|--------|
| [CuCl <sub>2</sub> (PyTn)] <sub>2</sub>                                                       | 88.60 | 2.91 | 3.61 | 30.49 | 13.73  |
| [Cu(bpdio)Cl <sub>2</sub> ] <sub>2</sub>                                                      | 96.68 | 2.84 | 3.84 | 33.99 | 4.87   |
| [Cu(dmgh)Cl <sub>2</sub> ] <sub>2</sub>                                                       | 88.00 | 2.70 | 3.45 | 32.62 | 0.62   |
| [Cu(Hfsaaep)Cl] <sub>2</sub>                                                                  | 95.27 | 2.85 | 3.45 | 33.48 | 0.30   |
| [Cu(ppmma)Cl <sub>2</sub> ] <sub>2</sub>                                                      | 89.73 | 2.70 | 3.51 | 33.28 | 0.00   |
| C <sub>22</sub> H <sub>32</sub> Cl <sub>4</sub> Cu <sub>2</sub> N <sub>4</sub> O <sub>2</sub> | 92.65 | 2.83 | 3.71 | 32.77 | -0.47  |
| [Cu(4-Metz)(DMF)Cl <sub>2</sub> ] <sub>2</sub>                                                | 95.30 | 2.72 | 3.39 | 34.99 | -3.60  |
| [Cu(guaH)Cl <sub>3</sub> ] <sub>2</sub>                                                       | 95.34 | 2.45 | 3.57 | 38.96 | -38.80 |
| [Cu(DMEN)Cl <sub>2</sub> ] <sub>2</sub>                                                       | 85.12 | 2.36 | 3.57 | 36.05 | -2.99  |
| [Cu(DMEN)Cl <sub>2</sub> ] <sub>2</sub>                                                       | 86.13 | 2.73 | 3.46 | 31.50 | -2.10  |
| [Cu(TMSO)Cl <sub>2</sub> ] <sub>2</sub>                                                       | 88.50 | 3.02 | 3.74 | 29.30 | -17.00 |
| [Cu(TMEN)Cl <sub>2</sub> ] <sub>2</sub>                                                       | 96.80 | 3.15 | 4.09 | 30.76 | -5.60  |
| [Cu(GuaH)Cl <sub>3</sub> ] <sub>2</sub>                                                       | 97.90 | 2.45 | 3.58 | 40.01 | -82.60 |

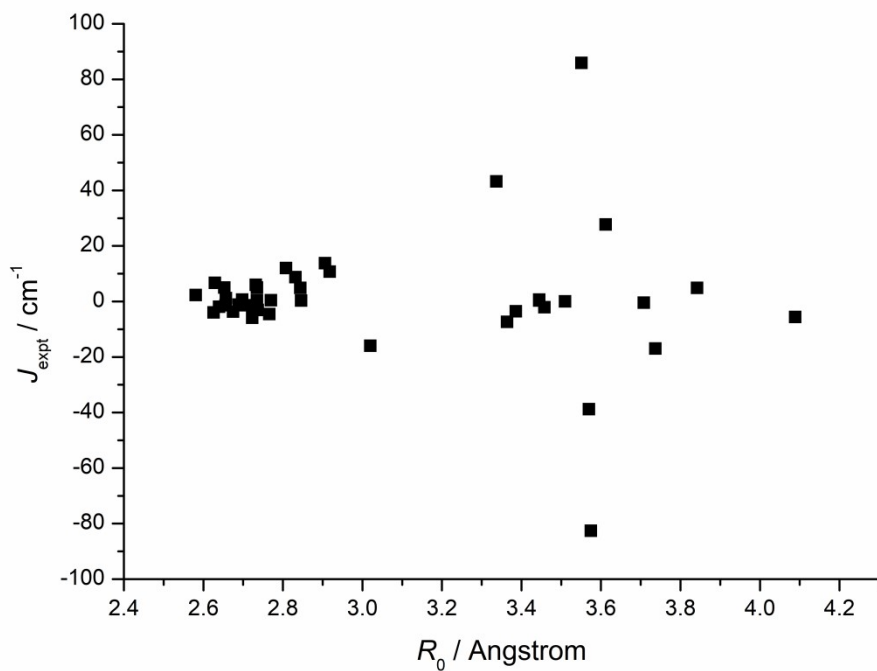

**Figure S1.** The magneto-structural correlation of  $J_{\text{expt}}$  and  $R_0$  were obtained by ref. 19,20.

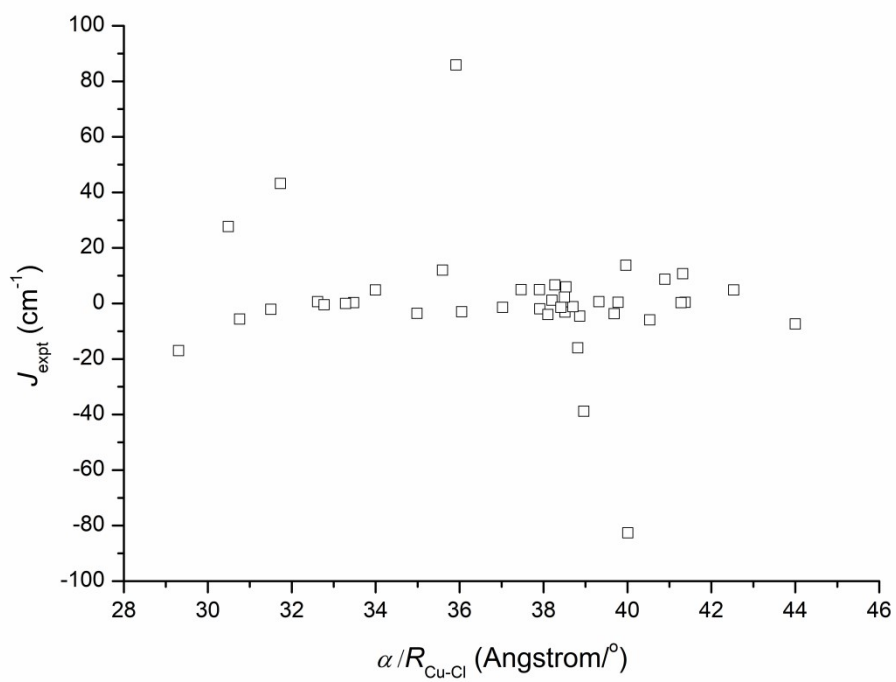

**Figure S2.** The magneto-structural correlation of  $J_{\text{expt}}$  and  $\alpha/R_{\text{Cu-Cl}}$  were obtained by ref. 19,20.

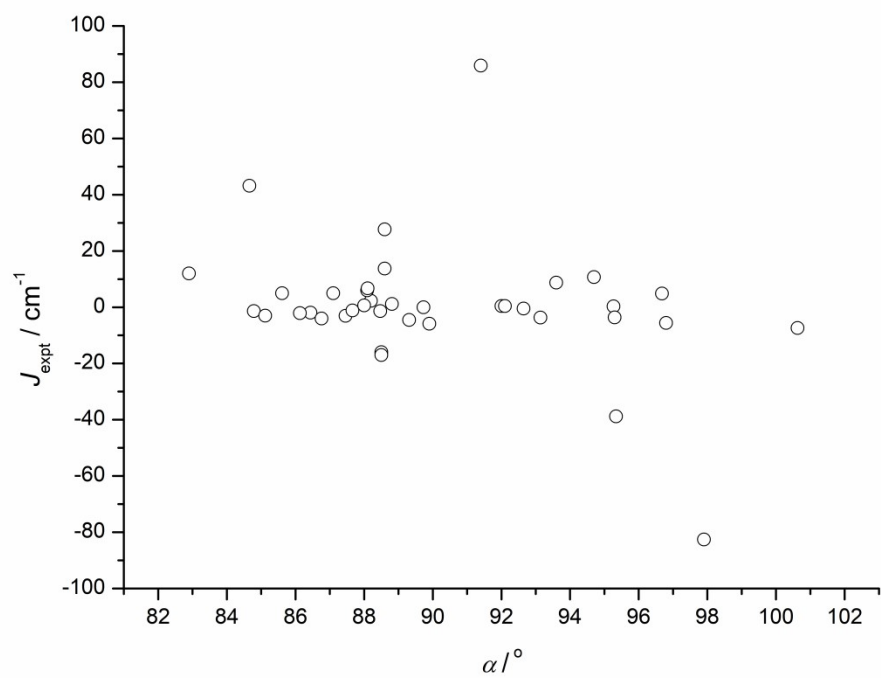

**Figure S3.** The magneto-structural correlation of  $J_{\text{expt}}$  and  $\alpha$  were obtained by ref. 19,20.

**Table S2.** Some selected bond lengths [ $\text{\AA}$ ] and angles [ $^\circ$ ] for complex A.

|         |       |             |        |
|---------|-------|-------------|--------|
| Cu1-Cl3 | 2.319 | Cu2-N10     | 2.117  |
| Cu1-Cl4 | 2.670 | Cu1-Cl3-Cu2 | 85.26  |
| Cu1-Cl5 | 2.277 | Cu1-Cl4-Cu2 | 85.26  |
| Cu1-N6  | 2.096 | Cl3-Cu1-Cl5 | 100.72 |
| Cu1-N7  | 2.117 | Cl3-Cu2-Cl8 | 107.01 |
| Cu2-Cl3 | 2.670 | Cl4-Cu1-Cl5 | 107.01 |
| Cu2-Cl4 | 2.319 | Cl4-Cu2-Cl8 | 100.73 |
| Cu2-Cl8 | 2.277 | N6-Cu1-N7   | 76.21  |
| Cu2-N9  | 2.096 | N9-Cu2-N10  | 76.21  |

**Table S3.** Calculated energies ( $E_{HS}$  and  $E_{BS}$ ),  $S_{HS}^2$ ,  $S_{BS}^2$  and  $J_{\text{calc}}$  with different functions under the ZORA-def2-TZVPP basis set ( $J_{\text{expt}} = 13.73 \text{ cm}^{-1}$ ).

| Functional | $E_{HS}/eV$   | $E_{BS}/eV$   | $S_{HS}^2$ | $S_{BS}^2$ | $J_{\text{calc}}/\text{cm}^{-1}$ |
|------------|---------------|---------------|------------|------------|----------------------------------|
| OLYP       | -184265.56662 | -184265.56469 | 2.00419    | 1.00402    | 15.57                            |
| PBE        | -184179.38588 | -184179.38427 | 2.00301    | 1.00296    | 12.98                            |
| BP86       | -184271.08909 | -184271.08751 | 2.00308    | 1.00303    | 12.73                            |
| PW91       | -184248.14705 | -184248.14549 | 2.00293    | 1.00288    | 12.61                            |
| BLYP       | -184245.32417 | -184245.32268 | 2.00285    | 1.00280    | 11.97                            |
| XLYP       | -184300.17483 | -184300.17338 | 2.00287    | 1.00281    | 11.63                            |
| O3LYP      | -184168.67089 | -184168.67000 | 2.00523    | 1.00521    | 7.14                             |
| B3P86      | -184242.98046 | -184242.98000 | 2.00597    | 1.00598    | 3.65                             |
| B3PW91     | -184232.70437 | -184232.70393 | 2.00585    | 1.00587    | 3.61                             |
| B3LYP      | -184222.38426 | -184222.38383 | 2.00571    | 1.00573    | 3.49                             |
| B3LYP*     | -184252.04824 | -184252.04781 | 2.00566    | 1.00568    | 3.48                             |
| X3LYP      | -184209.47090 | -184209.47052 | 2.00595    | 1.00597    | 3.10                             |
| B1P86      | -184263.03709 | -184263.03677 | 2.00672    | 1.00673    | 2.60                             |
| PBE0       | -184185.21537 | -184185.21505 | 2.00654    | 1.00656    | 2.55                             |
| B1LYP      | -184236.91656 | -184236.91625 | 2.00638    | 1.00641    | 2.45                             |

**Table S4.** Calculated energies ( $E_{HS}$  and  $E_{BS}$ ),  $S_{HS}^2$ ,  $S_{BS}^2$  and  $J_{calc}$  with different basis sets at the PBE function ( $J_{expt} = 13.73 \text{ cm}^{-1}$ ).

| Basis set          | $E_{HS}/eV$   | $E_{BS}/eV$   | $S_{HS}^2$ | $S_{BS}^2$ | $J_{calc}/\text{cm}^{-1}$ |
|--------------------|---------------|---------------|------------|------------|---------------------------|
| ZORA-def2-QZVPP    | -184187.09530 | -184187.09374 | 2.00306    | 1.00303    | 12.54                     |
| ZORA-def2-TZVPP    | -184179.38588 | -184179.38427 | 2.00301    | 1.00296    | 12.98                     |
| ZORA-def2-TZVP(-f) | -184178.36917 | -184178.36751 | 2.00287    | 1.00282    | 13.40                     |
| ZORA-def2-TZVP     | -184179.10722 | -184179.10556 | 2.00299    | 1.00294    | 13.40                     |
| ZORA-def2-SVP      | -184114.04534 | -184114.04366 | 2.00259    | 1.00246    | 13.57                     |

**Table S5.** The Mulliken spin population of HS and BS states for complex A.

| Atoms | HS state | BS state |
|-------|----------|----------|
| Cu(1) | 0.49322  | -0.49341 |
| Cu(2) | 0.49323  | 0.49342  |
| Cl(3) | 0.16772  | -0.16786 |
| Cl(4) | 0.16778  | 0.16792  |
| Cl(5) | 0.18374  | -0.18370 |
| N(6)  | 0.06822  | -0.06792 |
| N(7)  | 0.06770  | -0.06776 |
| Cl(8) | 0.18367  | 0.18363  |
| N(9)  | 0.06769  | 0.06793  |
| N(10) | 0.06822  | 0.06776  |

**Table S6.** Distribution of spin electrons in atomic orbitals of BS state complex A.

| Atoms | Atomic orbitals |          |          |
|-------|-----------------|----------|----------|
|       | $s$             | $p$      | $d$      |
| Cu(1) | 0.00989         | 0.00566  | -0.50894 |
| Cu(2) | -0.00990        | -0.00566 | 0.50896  |
| Cl(3) | -0.00150        | -0.16585 | -0.00045 |
| Cl(4) | 0.00149         | 0.16591  | 0.00045  |
| Cl(5) | -0.00160        | -0.18206 | 0.00004  |
| N(6)  | -0.01415        | -0.05304 | -0.00073 |
| N(7)  | -0.01509        | -0.05185 | -0.00081 |
| Cl(8) | 0.00160         | 0.18200  | -0.00004 |
| N(9)  | 0.01415         | 0.05304  | 0.00073  |
| N(10) | 0.01509         | 0.05184  | 0.00081  |

**Table S7.** Calculated energies ( $E_{HS}$  and  $E_{BS}$ ),  $S_{HS}^2$ ,  $S_{BS}^2$  and magnetic coupling constants

with different bond distance at the PBE/ZORA-def2-TZVP level.

| $R_0/\text{\AA}$ | $E_{HS}/eV$   | $E_{BS}/eV$   | $S_{HS}^2$ | $S_{BS}^2$ | $J_{\text{cacl}}/\text{cm}^{-1}$ | $R_{\text{Cu-Cl}}$ |                                 | $\alpha^\circ$ | $\alpha/R_{\text{Cu-Cl}}$    |                              |
|------------------|---------------|---------------|------------|------------|----------------------------------|--------------------|---------------------------------|----------------|------------------------------|------------------------------|
|                  |               |               |            |            |                                  | $1/\text{\AA}$     | $R_{\text{Cu-Cl-2}}/\text{\AA}$ |                | 1<br>[ $^\circ/\text{\AA}$ ] | 2<br>[ $^\circ/\text{\AA}$ ] |
| 3.0              | -184179.00812 | -184179.00623 | 2.00295    | 1.00268    | 15.25                            | 2.300              | 2.655                           | 74.1           | 32.22                        | 27.91                        |
| 3.1              | -184179.05284 | -184179.05100 | 2.00295    | 1.00282    | 14.78                            | 2.300              | 2.660                           | 77.0           | 33.48                        | 28.95                        |
| 3.2              | -184179.08566 | -184179.08396 | 2.00295    | 1.00290    | 13.72                            | 2.303              | 2.661                           | 79.9           | 34.69                        | 30.03                        |
| 3.3              | -184179.10170 | -184179.10017 | 2.00296    | 1.00294    | 12.38                            | 2.303              | 2.659                           | 82.9           | 36.00                        | 31.18                        |
| 3.4              | -184179.09684 | -184179.09544 | 2.00295    | 1.00295    | 11.24                            | 2.317              | 2.673                           | 85.6           | 36.94                        | 32.02                        |
| 3.5              | -184179.10061 | -184179.09922 | 2.00298    | 1.00288    | 11.22                            | 2.325              | 2.698                           | 88.0           | 37.85                        | 32.62                        |
| 3.6              | -184179.08769 | -184179.08647 | 2.00298    | 1.00273    | 9.86                             | 2.325              | 2.728                           | 90.5           | 38.92                        | 33.17                        |
| 3.7              | -184179.06030 | -184179.05928 | 2.00298    | 1.00264    | 8.24                             | 2.324              | 2.775                           | 92.6           | 39.85                        | 33.37                        |
| 3.8              | -184179.03617 | -184179.03543 | 2.00296    | 1.00260    | 5.98                             | 2.317              | 2.858                           | 93.9           | 40.53                        | 32.86                        |
| 3.9              | -184179.02717 | -184179.02660 | 2.00297    | 1.00258    | 4.57                             | 2.312              | 2.939                           | 95.2           | 41.18                        | 32.39                        |

**Table S8.** Calculated energies ( $E_{HS}$  and  $E_{BS}$ ),  $S_{HS}^2$ ,  $S_{BS}^2$  and magnetic coupling constants with different bond angle at the PBE/ZORA-def2-TZVP level.

| $\alpha^\circ$ | $E_{HS}/eV$   | $E_{BS}/eV$   | $S_{HS}^2$ | $S_{BS}^2$ | $J_{\text{cacl}}/\text{cm}^{-1}$ | $R_{\text{Cu-Cl}}$ |                                 | $R_0/\text{\AA}$ | $\alpha/R_{\text{Cu-Cl}}$    |                              |
|----------------|---------------|---------------|------------|------------|----------------------------------|--------------------|---------------------------------|------------------|------------------------------|------------------------------|
|                |               |               |            |            |                                  | $1/\text{\AA}$     | $R_{\text{Cu-Cl-2}}/\text{\AA}$ |                  | 1<br>[ $^\circ/\text{\AA}$ ] | 2<br>[ $^\circ/\text{\AA}$ ] |
| 80.0           | -184179.09314 | -184179.09185 | 2.00295    | 1.00280    | 10.40                            | 2.307              | 2.709                           | 3.239            | 34.68                        | 29.53                        |
| 83.0           | -184179.10255 | -184179.10111 | 2.00296    | 1.00292    | 11.62                            | 2.312              | 2.669                           | 3.311            | 35.90                        | 31.10                        |
| 86.0           | -184179.09745 | -184179.09592 | 2.00296    | 1.00294    | 12.31                            | 2.314              | 2.646                           | 3.392            | 37.17                        | 32.50                        |
| 89.0           | -184179.08926 | -184179.08761 | 2.00299    | 1.00263    | 13.35                            | 2.319              | 2.646                           | 3.488            | 38.38                        | 33.64                        |
| 92.0           | -184179.05873 | -184179.05714 | 2.00300    | 1.00233    | 12.80                            | 2.320              | 2.646                           | 3.580            | 39.66                        | 34.77                        |
| 95.0           | -184179.01204 | -184179.01043 | 2.00300    | 1.00207    | 12.92                            | 2.324              | 2.653                           | 3.676            | 40.88                        | 35.81                        |
| 98.0           | -184178.95090 | -184178.94926 | 2.00299    | 1.00168    | 13.22                            | 2.327              | 2.675                           | 3.782            | 42.11                        | 36.64                        |
| 101.0          | -184178.89198 | -184178.89057 | 2.00299    | 1.00096    | 11.30                            | 2.323              | 2.734                           | 3.911            | 43.48                        | 36.94                        |
| 104.0          | -184178.83725 | -184178.83604 | 2.00298    | 1.00072    | 9.76                             | 2.308              | 2.850                           | 4.078            | 45.06                        | 36.49                        |

**Table S9.** Calculated energies ( $E_{HS}$  and  $E_{BS}$ ),  $S_{HS}^2$ ,  $S_{BS}^2$  and magnetic coupling constantswith different Cu-Cl-Cu-Cl dihedral angle ( $\tau$ ) at the PBE/ZORA-def2-TZVP level.

| $\tau/^\circ$ | $E_{HS}/eV$   | $E_{BS}/eV$   | $S_{HS}^2$ | $S_{BS}^2$ | $J_{cacl}/cm^{-1}$ | $R_{Cu-Cl}/\text{\AA}$ | $R_{Cu-Cl}/\text{\AA}$ | $R_0/\text{\AA}$ | $\alpha/^\circ$ | $\alpha/R_{Cu-Cl-1}$<br>[ $^\circ/\text{\AA}$ ] | $\alpha/R_{Cu-Cl-2}$<br>[ $^\circ/\text{\AA}$ ] |
|---------------|---------------|---------------|------------|------------|--------------------|------------------------|------------------------|------------------|-----------------|-------------------------------------------------|-------------------------------------------------|
| 0             | -184179.10128 | -184179.09981 | 2.002955   | 1.002938   | 11.82              | 2.311                  | 2.658                  | 3.338            | 84.1            | 36.39                                           | 31.64                                           |
| 3             | -184179.09104 | -184179.08970 | 2.002938   | 1.002927   | 10.85              | 2.306                  | 2.677                  | 3.350            | 83.9            | 36.38                                           | 31.34                                           |
| 6             | -184179.08558 | -184179.08424 | 2.002955   | 1.002954   | 10.85              | 2.306                  | 2.657                  | 3.356            | 83.9            | 36.38                                           | 31.58                                           |
| 9             | -184179.06323 | -184179.06197 | 2.002946   | 1.002946   | 10.16              | 2.310                  | 2.675                  | 3.366            | 84.05           | 36.39                                           | 31.42                                           |
| 12            | -184179.04558 | -184179.04452 | 2.002936   | 1.002941   | 8.49               | 2.310                  | 2.695                  | 3.391            | 84.2            | 36.45                                           | 31.24                                           |
| 15            | -184178.97379 | -184178.97285 | 2.002884   | 1.002904   | 7.60               | 2.298                  | 2.735                  | 3.355            | 82.3            | 35.81                                           | 30.09                                           |
| 18            | -184178.96165 | -184178.96083 | 2.002890   | 1.002900   | 6.63               | 2.290                  | 2.740                  | 3.364            | 81.8            | 35.72                                           | 29.85                                           |
| 21            | -184178.96699 | -184178.96623 | 2.002911   | 1.002890   | 6.09               | 2.284                  | 2.759                  | 3.348            | 80.45           | 35.22                                           | 29.16                                           |

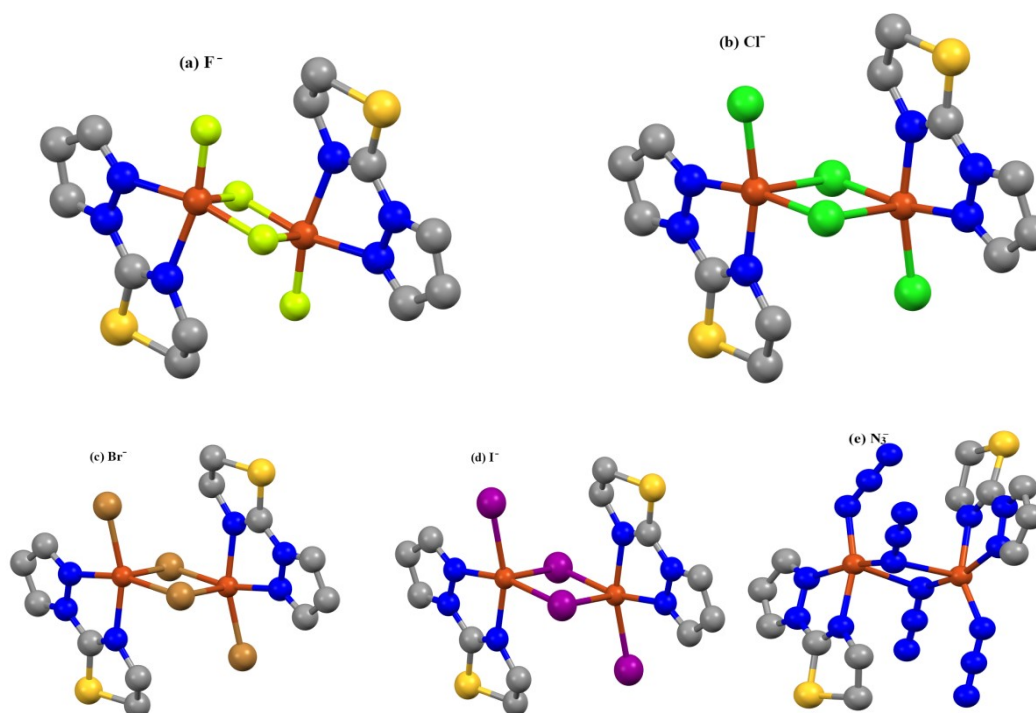**Figure S4.** Molecular structure optimized (I) for different ligands.

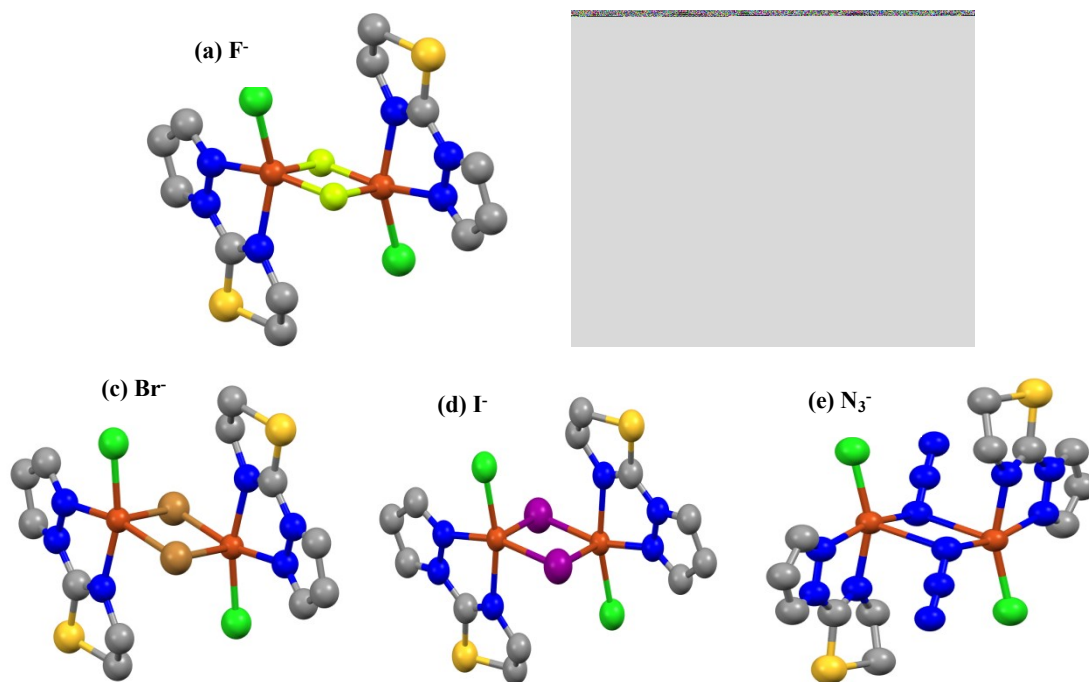

**Figure S5.** Molecular structure optimized (**II**) for different ligands.

**Table S9.** Calculated energies ( $E_{HS}$  and  $E_{BS}$ ),  $S_{HS}^2$ ,  $S_{BS}^2$  and magnetic coupling constants with different ligands at the PBE/ZORA-def2-TZVP level.

| Ligands                     | $E_{HS}/eV$   | $E_{BS}/eV$   | $S_{HS}^2$ | $S_{BS}^2$ | $J_{\text{cacl}}/\text{cm}^{-1}$ |
|-----------------------------|---------------|---------------|------------|------------|----------------------------------|
| F <sup>-</sup>              | -144736.69512 | -144736.69287 | 2.00320    | 1.00317    | 18.17                            |
| Cl <sup>-</sup>             | -184179.10722 | -184179.10556 | 2.00299    | 1.00294    | 13.40                            |
| Br <sup>-</sup>             | -419474.28663 | -419474.28518 | 2.00299    | 1.00299    | 11.68                            |
| I <sup>-</sup>              | -920122.93826 | -920122.93738 | 2.00299    | 1.00234    | 7.12                             |
| N <sub>3</sub> <sup>-</sup> | -151736.02343 | -151736.02300 | 2.00495    | 1.00334    | 3.42                             |

**Table S10.** Calculated energies ( $E_{HS}$  and  $E_{BS}$ ),  $S_{HS}^2$ ,  $S_{BS}^2$  and magnetic coupling constants with different ligands at the PBE/ZORA-def2-TZVP level.

| Ligands         | $E_{HS}/eV$   | $E_{BS}/eV$   | $S_{HS}^2$ | $S_{BS}^2$ | $J_{\text{cacl}}/\text{cm}^{-1}$ |
|-----------------|---------------|---------------|------------|------------|----------------------------------|
| F <sup>-</sup>  | -164457.98007 | -164457.97835 | 2.00304    | 1.00044    | 13.80                            |
| Cl <sup>-</sup> | -184179.10722 | -184179.10556 | 2.00299    | 1.00294    | 13.40                            |
| Br <sup>-</sup> | -301826.66903 | -301826.66849 | 2.00298    | 1.00229    | 4.38                             |
| I <sup>-</sup>  | -552151.00188 | -552151.00045 | 2.00307    | 1.00307    | 11.60                            |



---

|         |               |               |         |         |      |
|---------|---------------|---------------|---------|---------|------|
| $N_3^-$ | -167957.76973 | -167957.76854 | 2.00404 | 1.00356 | 9.61 |
|---------|---------------|---------------|---------|---------|------|

---

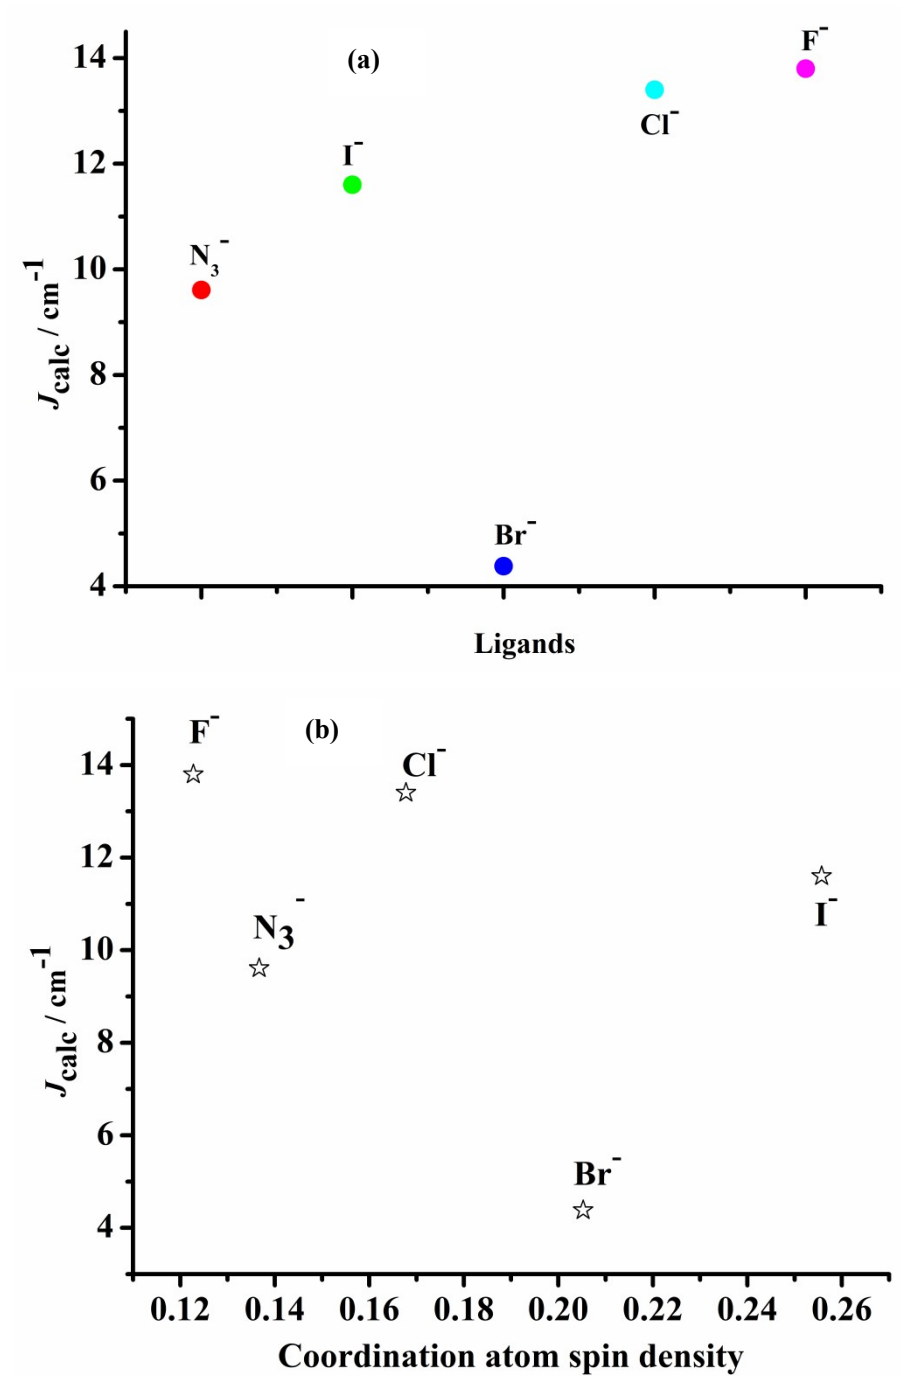

**Figure S6.** Magneto-structural correlation of  $J_{\text{calc}}$  and ligands were obtained by BS-DFT (Model II). (a) The magneto-structural correlation of  $J_{\text{calc}}$ -ligand; (b) spin density variation of Cu(II) and bridging coordination atoms in the triplet state ( $S=1$ ).

**Table S11.** DFT-optimized Cartesian coordinates of dichloro-bridged dinuclear copper(II) complexes (M06-2X/def2-TZVPP).

| Cu•••Cu distance ( $R_0 = 3.0 \text{ \AA}$ ) |           |           |           | Cu•••Cu distance ( $R_0 = 3.1 \text{ \AA}$ ) |           |           |           |
|----------------------------------------------|-----------|-----------|-----------|----------------------------------------------|-----------|-----------|-----------|
| E = -182658.29388 eV                         |           |           |           | E = -182658.34753 eV                         |           |           |           |
| Cu                                           | 0.311801  | -0.111298 | -0.073383 | Cu                                           | 0.261171  | -0.098910 | -0.081628 |
| Cu                                           | 3.299929  | 0.111294  | 0.073398  | Cu                                           | 3.350542  | 0.098934  | 0.081614  |
| Cl                                           | 1.954176  | 1.973847  | -0.018215 | Cl                                           | 1.970178  | 1.937290  | 0.000717  |
| Cl                                           | 1.657545  | -1.973856 | 0.018251  | Cl                                           | 1.641522  | -1.937275 | -0.000745 |
| Cl                                           | -0.372965 | -0.255878 | -2.240044 | Cl                                           | -0.403359 | -0.222432 | -2.254325 |
| Cl                                           | 3.984742  | 0.255871  | 2.240046  | Cl                                           | 4.015068  | 0.222479  | 2.254309  |
| C                                            | -0.289802 | 1.072560  | 2.468986  | C                                            | -0.313601 | 1.084492  | 2.466531  |
| C                                            | 0.856232  | -0.772988 | 3.111666  | C                                            | 0.840452  | -0.760394 | 3.098114  |
| H                                            | 1.784537  | -1.219649 | 2.765644  | H                                            | 1.765869  | -1.202002 | 2.737531  |
| H                                            | 0.146183  | -1.563532 | 3.366060  | H                                            | 0.140153  | -1.555044 | 3.365828  |
| C                                            | -1.727402 | 2.342460  | -0.364718 | C                                            | -1.756443 | 2.370133  | -0.358725 |
| H                                            | -1.903217 | 2.188039  | -1.416959 | H                                            | -1.931159 | 2.222788  | -1.412161 |
| C                                            | -2.049135 | 3.434925  | 0.473599  | C                                            | -2.085394 | 3.453245  | 0.488654  |
| H                                            | -2.565194 | 4.338820  | 0.206492  | H                                            | -2.607378 | 4.355876  | 0.229061  |
| C                                            | -1.552672 | 3.100331  | 1.703631  | C                                            | -1.586927 | 3.111523  | 1.715999  |
| H                                            | -1.540849 | 3.621657  | 2.645490  | H                                            | -1.579296 | 3.624674  | 2.662400  |
| C                                            | 1.114380  | 0.168370  | 4.288830  | C                                            | 1.114758  | 0.184003  | 4.269971  |
| H                                            | 2.083001  | 0.652059  | 4.186145  | H                                            | 2.084202  | 0.663621  | 4.156138  |
| H                                            | 1.025410  | -0.322703 | 5.253164  | H                                            | 1.035221  | -0.304793 | 5.236275  |
| S                                            | -0.178580 | 1.458071  | 4.161869  | S                                            | -0.174889 | 1.478315  | 4.155412  |
| N                                            | -1.097444 | 1.414348  | 0.314036  | N                                            | -1.120843 | 1.440501  | 0.312833  |
| N                                            | 0.269678  | 0.021161  | 2.035101  | N                                            | 0.232334  | 0.027904  | 2.029173  |
| N                                            | -0.991291 | 1.871547  | 1.575265  | N                                            | -1.017462 | 1.887820  | 1.577745  |
| C                                            | 3.901487  | -1.072559 | -2.468982 | C                                            | 3.925294  | -1.084503 | -2.466526 |
| C                                            | 2.755538  | 0.773047  | -3.111649 | C                                            | 2.771316  | 0.760421  | -3.098138 |
| H                                            | 1.827245  | 1.219739  | -2.765636 | H                                            | 1.845914  | 1.202069  | -2.737566 |
| H                                            | 3.465626  | 1.563568  | -3.366012 | H                                            | 3.471649  | 1.555041  | -3.365852 |
| C                                            | 5.339035  | -2.342540 | 0.364711  | C                                            | 5.368082  | -2.370159 | 0.358750  |
| H                                            | 5.514860  | -2.188131 | 1.416952  | H                                            | 5.542803  | -2.222807 | 1.412184  |
| C                                            | 5.660708  | -3.435019 | -0.473611 | C                                            | 5.696999  | -3.453293 | -0.488615 |
| H                                            | 6.176721  | -4.338941 | -0.206509 | H                                            | 6.218951  | -4.355939 | -0.229011 |
| C                                            | 5.164255  | -3.100396 | -1.703638 | C                                            | 5.198535  | -3.111574 | -1.715963 |
| H                                            | 5.152397  | -3.621719 | -2.645498 | H                                            | 5.190877  | -3.624741 | -2.662355 |
| C                                            | 2.497377  | -0.168276 | -4.288838 | C                                            | 2.496987  | -0.183974 | -4.269991 |
| H                                            | 1.528733  | -0.651926 | -4.186182 | H                                            | 1.527522  | -0.663551 | -4.156166 |
| H                                            | 2.586390  | 0.322813  | -5.253160 | H                                            | 2.576559  | 0.304812  | -5.236298 |
| S                                            | 3.790278  | -1.458035 | -4.161874 | S                                            | 3.786577  | -1.478340 | -4.155403 |
| N                                            | 4.709125  | -1.414391 | -0.314037 | N                                            | 4.732523  | -1.440510 | -0.312823 |
| N                                            | 3.342040  | -0.021146 | -2.035087 | N                                            | 3.379394  | -0.027890 | -2.029184 |
| N                                            | 4.602943  | -1.871581 | -1.575267 | N                                            | 4.629124  | -1.887844 | -1.577728 |

Cu•••Cu distance ( $R_0 = 3.2 \text{ \AA}$ )

E = -182658.38292 eV

|    |           |           |           |
|----|-----------|-----------|-----------|
| Cu | 0.210702  | -0.079245 | -0.095680 |
| Cu | 3.401040  | 0.079271  | 0.095672  |
| Cl | 1.988922  | 1.896900  | 0.021967  |
| Cl | 1.622807  | -1.896881 | -0.021961 |
| Cl | -0.451911 | -0.188796 | -2.267575 |
| Cl | 4.063690  | 0.188834  | 2.267556  |
| C  | -0.338284 | 1.098997  | 2.462395  |
| C  | 0.826110  | -0.744041 | 3.079489  |
| H  | 1.748533  | -1.181460 | 2.706262  |
| H  | 0.136032  | -1.543493 | 3.359169  |
| C  | -1.789357 | 2.403545  | -0.351804 |
| H  | -1.964119 | 2.264831  | -1.406267 |
| C  | -2.128483 | 3.473762  | 0.507311  |
| H  | -2.659493 | 4.373844  | 0.257672  |
| C  | -1.626213 | 3.123602  | 1.731061  |
| H  | -1.624167 | 3.625778  | 2.683179  |
| C  | 1.114521  | 0.201621  | 4.247809  |
| H  | 2.083802  | 0.679408  | 4.123622  |
| H  | 1.046133  | -0.286766 | 5.215144  |
| S  | -0.174769 | 1.497345  | 4.148364  |
| N  | -1.144414 | 1.472969  | 0.310102  |
| N  | 0.196444  | 0.039521  | 2.019914  |
| N  | -1.044323 | 1.907708  | 1.579081  |
| C  | 3.949979  | -1.098998 | -2.462394 |
| C  | 2.785644  | 0.744075  | -3.079494 |
| H  | 1.863234  | 1.181520  | -2.706265 |
| H  | 3.475744  | 1.543506  | -3.359179 |
| C  | 5.401011  | -2.403582 | 0.351809  |
| H  | 5.575785  | -2.264865 | 1.406269  |
| C  | 5.740080  | -3.473825 | -0.507297 |
| H  | 6.271046  | -4.373931 | -0.257651 |
| C  | 5.237811  | -3.123659 | -1.731045 |
| H  | 5.235728  | -3.625846 | -2.683157 |
| C  | 2.497203  | -0.201584 | -4.247811 |
| H  | 1.527907  | -0.679339 | -4.123624 |
| H  | 2.565609  | 0.286798  | -5.215147 |
| S  | 3.786449  | -1.497351 | -4.148359 |
| N  | 4.756114  | -1.472979 | -0.310104 |
| N  | 3.415289  | -0.039501 | -2.019918 |
| N  | 4.655990  | -1.907730 | -1.579077 |

Cu•••Cu distance ( $R_0 = 3.4 \text{ \AA}$ )

E = -182658.40223 eV

Cu•••Cu distance ( $R_0 = 3.3 \text{ \AA}$ )

E = -182658.40136 eV

|    |           |           |           |
|----|-----------|-----------|-----------|
| Cu | 0.160299  | -0.058286 | -0.105652 |
| Cu | 3.451462  | 0.058303  | 0.105663  |
| Cl | 2.001166  | 1.854393  | 0.047715  |
| Cl | 1.610587  | -1.854379 | -0.047667 |
| Cl | -0.494541 | -0.137659 | -2.281626 |
| Cl | 4.106348  | 0.137670  | 2.281626  |
| C  | -0.365488 | 1.113464  | 2.460407  |
| C  | 0.804128  | -0.730007 | 3.065602  |
| H  | 1.718524  | -1.170699 | 2.676040  |
| H  | 0.119684  | -1.527741 | 3.363609  |
| C  | -1.828054 | 2.433209  | -0.341637 |
| H  | -2.002708 | 2.302583  | -1.397354 |
| C  | -2.174721 | 3.492791  | 0.527406  |
| H  | -2.713059 | 4.390958  | 0.286242  |
| C  | -1.667536 | 3.136011  | 1.747171  |
| H  | -1.668773 | 3.630018  | 2.703837  |
| C  | 1.117267  | 0.220724  | 4.223738  |
| H  | 2.087017  | 0.693097  | 4.082726  |
| H  | 1.063211  | -0.263708 | 5.194062  |
| S  | -0.168305 | 1.521430  | 4.140323  |
| N  | -1.174170 | 1.502307  | 0.311141  |
| N  | 0.153369  | 0.047854  | 2.014216  |
| N  | -1.075265 | 1.926884  | 1.583858  |
| C  | 3.977178  | -1.113459 | -2.460404 |
| C  | 2.807637  | 0.730059  | -3.065597 |
| H  | 1.893255  | 1.170784  | -2.676038 |
| H  | 3.492114  | 1.527768  | -3.363596 |
| C  | 5.439710  | -2.433267 | 0.341627  |
| H  | 5.614388  | -2.302644 | 1.397339  |
| C  | 5.786284  | -3.492885 | -0.527411 |
| H  | 6.324560  | -4.391090 | -0.286246 |
| C  | 5.279101  | -3.136083 | -1.747170 |
| H  | 5.280278  | -3.630103 | -2.703828 |
| C  | 2.494469  | -0.220653 | -4.223741 |
| H  | 1.524700  | -0.692990 | -4.082739 |
| H  | 2.548551  | 0.263784  | -5.194061 |
| S  | 3.779989  | -1.521410 | -4.140323 |
| N  | 4.785885  | -1.502323 | -0.311150 |
| N  | 3.458359  | -0.047831 | -2.014210 |
| N  | 4.686927  | -1.926908 | -1.583861 |

Cu•••Cu distance ( $R_0 = 3.5 \text{ \AA}$ )

E = -182658.38324 eV

|                                              |           |           |           |                                              |           |           |           |
|----------------------------------------------|-----------|-----------|-----------|----------------------------------------------|-----------|-----------|-----------|
| Cu                                           | 0.110636  | -0.029151 | -0.124156 | Cu                                           | 0.063579  | 0.086257  | -0.139903 |
| Cu                                           | 3.501056  | 0.029175  | 0.124142  | Cu                                           | 3.548113  | -0.086212 | 0.139872  |
| Cl                                           | 2.029533  | 1.818971  | 0.094181  | Cl                                           | 2.148867  | 1.770548  | 0.167670  |
| Cl                                           | 1.582164  | -1.818940 | -0.094198 | Cl                                           | 1.462810  | -1.770516 | -0.167716 |
| Cl                                           | -0.512449 | -0.028458 | -2.311109 | Cl                                           | -0.530332 | 0.207312  | -2.328485 |
| Cl                                           | 4.124122  | 0.028474  | 2.311101  | Cl                                           | 4.142012  | -0.207233 | 2.328459  |
| C                                            | -0.396206 | 1.128074  | 2.453136  | C                                            | -0.461227 | 1.186668  | 2.462716  |
| C                                            | 0.784063  | -0.712772 | 3.040975  | C                                            | 0.765063  | -0.636780 | 3.003870  |
| H                                            | 1.686767  | -1.160737 | 2.633034  | H                                            | 1.664464  | -1.070812 | 2.574727  |
| H                                            | 0.105172  | -1.504762 | 3.365588  | H                                            | 0.103188  | -1.438132 | 3.339989  |
| C                                            | -1.877476 | 2.465444  | -0.331524 | C                                            | -1.954706 | 2.565240  | -0.295705 |
| H                                            | -2.053970 | 2.344226  | -1.387891 | H                                            | -2.108984 | 2.474708  | -1.358378 |
| C                                            | -2.231567 | 3.511863  | 0.549800  | C                                            | -2.381009 | 3.553519  | 0.619672  |
| H                                            | -2.779338 | 4.407122  | 0.319689  | H                                            | -2.974446 | 4.425166  | 0.414126  |
| C                                            | -1.716556 | 3.147352  | 1.764266  | C                                            | -1.866318 | 3.169260  | 1.828475  |
| H                                            | -1.719157 | 3.631042  | 2.726080  | H                                            | -1.915830 | 3.610352  | 2.809089  |
| C                                            | 1.131080  | 0.247594  | 4.180899  | C                                            | 1.126039  | 0.323899  | 4.136848  |
| H                                            | 2.095242  | 0.720303  | 4.006516  | H                                            | 2.066343  | 0.830280  | 3.928723  |
| H                                            | 1.109384  | -0.228898 | 5.156364  | H                                            | 1.161448  | -0.157600 | 5.109262  |
| S                                            | -0.160048 | 1.544358  | 4.125862  | S                                            | -0.207117 | 1.579704  | 4.139742  |
| N                                            | -1.212513 | 1.533766  | 0.309803  | N                                            | -1.248094 | 1.646922  | 0.321075  |
| N                                            | 0.107905  | 0.058304  | 2.000064  | N                                            | 0.055014  | 0.134005  | 1.985085  |
| N                                            | -1.113144 | 1.946229  | 1.586098  | N                                            | -1.192864 | 2.012494  | 1.613918  |
| C                                            | 4.007899  | -1.128084 | -2.453135 | C                                            | 4.072922  | -1.186683 | -2.462716 |
| C                                            | 2.827641  | 0.712762  | -3.040999 | C                                            | 2.846634  | 0.636753  | -3.003912 |
| H                                            | 1.924943  | 1.160743  | -2.633062 | H                                            | 1.947249  | 1.070815  | -2.574767 |
| H                                            | 3.506539  | 1.504737  | -3.365630 | H                                            | 3.508515  | 1.438080  | -3.340082 |
| C                                            | 5.489164  | -2.465423 | 0.331542  | C                                            | 5.566402  | -2.565196 | 0.295734  |
| H                                            | 5.665657  | -2.344193 | 1.387908  | H                                            | 5.720679  | -2.474644 | 1.358405  |
| C                                            | 5.843252  | -3.511855 | -0.549768 | C                                            | 5.992720  | -3.553486 | -0.619626 |
| H                                            | 6.391018  | -4.407113 | -0.319645 | H                                            | 6.586168  | -4.425121 | -0.414064 |
| C                                            | 5.328240  | -3.147359 | -1.764238 | C                                            | 5.478024  | -3.169255 | -1.828436 |
| H                                            | 5.330840  | -3.631062 | -2.726046 | H                                            | 5.527545  | -3.610363 | -2.809042 |
| C                                            | 2.480613  | -0.247622 | -4.180905 | C                                            | 2.485624  | -0.323969 | -4.136842 |
| H                                            | 1.516449  | -0.720322 | -4.006509 | H                                            | 1.545326  | -0.830344 | -3.928670 |
| H                                            | 2.502303  | 0.228855  | -5.156379 | H                                            | 2.450186  | 0.157491  | -5.109273 |
| S                                            | 3.771733  | -1.544393 | -4.125854 | S                                            | 3.818782  | -1.579772 | -4.139724 |
| N                                            | 4.824205  | -1.533751 | -0.309796 | N                                            | 4.859781  | -1.646897 | -0.321064 |
| N                                            | 3.503794  | -0.058304 | -2.000079 | N                                            | 3.556695  | -0.133999 | -1.985111 |
| N                                            | 4.724833  | -1.946230 | -1.586086 | N                                            | 4.804557  | -2.012492 | -1.613900 |
| Cu•••Cu distance ( $R_0 = 3.6 \text{ \AA}$ ) |           |           |           | Cu•••Cu distance ( $R_0 = 3.7 \text{ \AA}$ ) |           |           |           |
| E = -182658.35703 eV                         |           |           |           | E = -182658.32006 eV                         |           |           |           |
| Cu                                           | 0.017342  | 0.127438  | -0.158858 | Cu                                           | -0.029925 | 0.138907  | -0.181979 |
| Cu                                           | 3.594223  | -0.127479 | 0.158856  | Cu                                           | 3.641633  | -0.138917 | 0.181991  |

|                                              |           |           |           |                                              |           |           |           |
|----------------------------------------------|-----------|-----------|-----------|----------------------------------------------|-----------|-----------|-----------|
| Cl                                           | 2.194137  | 1.727049  | 0.222388  | Cl                                           | 2.218428  | 1.695576  | 0.287396  |
| Cl                                           | 1.417442  | -1.727081 | -0.222463 | Cl                                           | 1.393305  | -1.695566 | -0.287375 |
| Cl                                           | -0.555868 | 0.295817  | -2.348023 | Cl                                           | -0.580222 | 0.353905  | -2.371842 |
| Cl                                           | 4.167306  | -0.295867 | 2.348051  | Cl                                           | 4.191893  | -0.353943 | 2.371862  |
| C                                            | -0.495092 | 1.202607  | 2.456353  | C                                            | -0.518041 | 1.199853  | 2.440973  |
| C                                            | 0.753772  | -0.613391 | 2.967903  | C                                            | 0.748951  | -0.609555 | 2.926826  |
| H                                            | 1.642049  | -1.048449 | 2.517120  | H                                            | 1.622486  | -1.049895 | 2.452984  |
| H                                            | 0.101271  | -1.414274 | 3.323472  | H                                            | 0.107815  | -1.407100 | 3.309838  |
| C                                            | -2.002329 | 2.603875  | -0.283467 | C                                            | -2.038023 | 2.621493  | -0.281912 |
| H                                            | -2.154465 | 2.527514  | -1.347803 | H                                            | -2.192599 | 2.554251  | -1.346542 |
| C                                            | -2.439983 | 3.574768  | 0.644752  | C                                            | -2.467281 | 3.588054  | 0.654051  |
| H                                            | -3.041962 | 4.443272  | 0.450405  | H                                            | -3.064541 | 4.461539  | 0.467360  |
| C                                            | -1.922425 | 3.179082  | 1.848771  | C                                            | -1.947441 | 3.181753  | 1.853798  |
| H                                            | -1.977773 | 3.607485  | 2.834931  | H                                            | -1.995928 | 3.604721  | 2.842671  |
| C                                            | 1.140953  | 0.352892  | 4.085710  | C                                            | 1.169571  | 0.366802  | 4.022872  |
| H                                            | 2.066112  | 0.871826  | 3.842808  | H                                            | 2.081019  | 0.891111  | 3.742710  |
| H                                            | 1.218254  | -0.124782 | 5.057553  | H                                            | 1.285350  | -0.103062 | 4.994728  |
| S                                            | -0.209717 | 1.590136  | 4.130150  | S                                            | -0.188783 | 1.595079  | 4.104568  |
| N                                            | -1.286887 | 1.684342  | 0.321499  | N                                            | -1.325914 | 1.693537  | 0.314972  |
| N                                            | 0.016465  | 0.153828  | 1.965523  | N                                            | -0.018769 | 0.149245  | 1.941001  |
| N                                            | -1.237122 | 2.032453  | 1.619810  | N                                            | -1.269964 | 2.032766  | 1.615281  |
| C                                            | 4.106786  | -1.202640 | -2.456333 | C                                            | 4.129744  | -1.199849 | -2.440967 |
| C                                            | 2.858091  | 0.613449  | -2.967968 | C                                            | 2.862854  | 0.609627  | -2.926831 |
| H                                            | 1.969809  | 1.048575  | -2.517268 | H                                            | 1.989327  | 1.050001  | -2.453009 |
| H                                            | 3.510694  | 1.414282  | -3.323463 | H                                            | 3.504041  | 1.407148  | -3.309809 |
| C                                            | 5.613861  | -2.603931 | 0.283558  | C                                            | 5.649613  | -2.621583 | 0.281929  |
| H                                            | 5.765947  | -2.527570 | 1.347901  | H                                            | 5.804177  | -2.554356 | 1.346562  |
| C                                            | 6.051542  | -3.574834 | -0.644639 | C                                            | 6.078827  | -3.588166 | -0.654032 |
| H                                            | 6.653498  | -4.443347 | -0.450264 | H                                            | 6.676031  | -4.461688 | -0.467337 |
| C                                            | 5.534046  | -3.179141 | -1.848682 | C                                            | 5.559022  | -3.181831 | -1.853783 |
| H                                            | 5.589435  | -3.607545 | -2.834839 | H                                            | 5.607492  | -3.604802 | -2.842655 |
| C                                            | 2.470946  | -0.352785 | -4.085829 | C                                            | 2.442222  | -0.366691 | -4.022909 |
| H                                            | 1.545724  | -0.871651 | -3.843028 | H                                            | 1.530738  | -0.890958 | -3.742790 |
| H                                            | 2.393777  | 0.124915  | -5.057670 | H                                            | 2.326502  | 0.103198  | -4.994761 |
| S                                            | 3.821522  | -1.590132 | -4.130159 | S                                            | 3.800517  | -1.595035 | -4.104579 |
| N                                            | 4.898456  | -1.684392 | -0.321440 | N                                            | 4.937574  | -1.693579 | -0.314961 |
| N                                            | 3.595242  | -0.153844 | -1.965528 | N                                            | 3.630505  | -0.149227 | -1.940993 |
| N                                            | 4.848746  | -2.032505 | -1.619752 | N                                            | 4.881618  | -2.032800 | -1.615271 |
| Cu•••Cu distance ( $R_0 = 3.8 \text{ \AA}$ ) |           |           |           | Cu•••Cu distance ( $R_0 = 3.9 \text{ \AA}$ ) |           |           |           |
| E = -182658.28124 eV                         |           |           |           | E = -182658.24374 eV                         |           |           |           |
| Cu                                           | -0.077449 | 0.134090  | -0.212306 | Cu                                           | -0.126796 | 0.121496  | -0.229046 |
| Cu                                           | 3.689221  | -0.134058 | 0.212302  | Cu                                           | 3.738576  | -0.121485 | 0.229059  |
| Cl                                           | 2.257185  | 1.682190  | 0.352091  | Cl                                           | 2.291577  | 1.675408  | 0.383753  |
| Cl                                           | 1.354621  | -1.682128 | -0.352080 | Cl                                           | 1.320260  | -1.675348 | -0.383716 |

|                                                       |           |           |           |                                                       |           |           |           |
|-------------------------------------------------------|-----------|-----------|-----------|-------------------------------------------------------|-----------|-----------|-----------|
| Cl                                                    | -0.602767 | 0.404968  | -2.399831 | Cl                                                    | -0.639269 | 0.420487  | -2.413106 |
| Cl                                                    | 4.214532  | -0.404957 | 2.399827  | Cl                                                    | 4.251034  | -0.420523 | 2.413117  |
| C                                                     | -0.524539 | 1.192892  | 2.415687  | C                                                     | -0.526657 | 1.192495  | 2.399628  |
| C                                                     | 0.749285  | -0.615769 | 2.879304  | C                                                     | 0.753573  | -0.616716 | 2.845919  |
| H                                                     | 1.604741  | -1.068882 | 2.385139  | H                                                     | 1.602725  | -1.066780 | 2.338426  |
| H                                                     | 0.115057  | -1.404782 | 3.290754  | H                                                     | 0.127565  | -1.408915 | 3.263552  |
| C                                                     | -2.070198 | 2.626490  | -0.286928 | C                                                     | -2.099371 | 2.628846  | -0.286106 |
| H                                                     | -2.233982 | 2.564213  | -1.350360 | H                                                     | -2.274801 | 2.567156  | -1.347772 |
| C                                                     | -2.484139 | 3.592848  | 0.655353  | C                                                     | -2.497131 | 3.598492  | 0.659396  |
| H                                                     | -3.077646 | 4.470459  | 0.476643  | H                                                     | -3.087067 | 4.479617  | 0.486131  |
| C                                                     | -1.954507 | 3.180422  | 1.849105  | C                                                     | -1.956376 | 3.184517  | 1.847692  |
| H                                                     | -1.989684 | 3.600952  | 2.839407  | H                                                     | -1.976986 | 3.607122  | 2.837577  |
| C                                                     | 1.207533  | 0.370406  | 3.950898  | C                                                     | 1.224561  | 0.367700  | 3.914140  |
| H                                                     | 2.107850  | 0.892850  | 3.634226  | H                                                     | 2.123778  | 0.887655  | 3.590917  |
| H                                                     | 1.356116  | -0.090544 | 4.922608  | H                                                     | 1.379846  | -0.094837 | 4.884026  |
| S                                                     | -0.149332 | 1.598402  | 4.066117  | S                                                     | -0.126832 | 1.600784  | 4.043189  |
| N                                                     | -1.358353 | 1.691929  | 0.301096  | N                                                     | -1.386463 | 1.690626  | 0.295148  |
| N                                                     | -0.043269 | 0.137021  | 1.908466  | N                                                     | -0.054290 | 0.135149  | 1.886815  |
| N                                                     | -1.287517 | 2.027736  | 1.601161  | N                                                     | -1.299012 | 2.027738  | 1.594053  |
| C                                                     | 4.136244  | -1.192886 | -2.415692 | C                                                     | 4.138370  | -1.192472 | -2.399633 |
| C                                                     | 2.862491  | 0.615827  | -2.879307 | C                                                     | 2.858222  | 0.616801  | -2.845900 |
| H                                                     | 2.007060  | 1.068976  | -2.385131 | H                                                     | 2.009096  | 1.066898  | -2.338390 |
| H                                                     | 3.496745  | 1.404814  | -3.290768 | H                                                     | 3.484257  | 1.408978  | -3.263534 |
| C                                                     | 5.681835  | -2.626555 | 0.286926  | C                                                     | 5.710985  | -2.628958 | 0.286087  |
| H                                                     | 5.845628  | -2.564280 | 1.350356  | H                                                     | 5.886418  | -2.567292 | 1.347754  |
| C                                                     | 6.095693  | -3.592957 | -0.655346 | C                                                     | 6.108656  | -3.598635 | -0.659420 |
| H                                                     | 6.689134  | -4.470611 | -0.476630 | H                                                     | 6.698510  | -4.479816 | -0.486160 |
| C                                                     | 5.566083  | -3.180505 | -1.849100 | C                                                     | 5.567934  | -3.184607 | -1.847712 |
| H                                                     | 5.601218  | -3.601051 | -2.839396 | H                                                     | 5.588497  | -3.607214 | -2.837597 |
| C                                                     | 2.404191  | -0.370336 | -3.950890 | C                                                     | 2.387178  | -0.367586 | -3.914123 |
| H                                                     | 1.503858  | -0.892743 | -3.634202 | H                                                     | 1.487942  | -0.887503 | -3.590894 |
| H                                                     | 2.255613  | 0.090613  | -4.922601 | H                                                     | 2.231904  | 0.094964  | -4.884004 |
| S                                                     | 3.761006  | -1.598389 | -4.066117 | S                                                     | 3.738516  | -1.600728 | -4.043195 |
| N                                                     | 4.970058  | -1.691947 | -0.301104 | N                                                     | 4.998160  | -1.690671 | -0.295160 |
| N                                                     | 3.655026  | -0.136989 | -1.908473 | N                                                     | 3.666062  | -0.135106 | -1.886809 |
| N                                                     | 4.899185  | -2.027764 | -1.601166 | N                                                     | 4.910676  | -2.027770 | -1.594066 |
| Cu-( $\mu$ -Cl)-Cu bond angle ( $\alpha = 80^\circ$ ) |           |           |           | Cu-( $\mu$ -Cl)-Cu bond angle ( $\alpha = 83^\circ$ ) |           |           |           |
| E = -182658.38879 eV                                  |           |           |           | E = -182658.40245 eV                                  |           |           |           |
| Cu                                                    | 0.191621  | -0.086835 | -0.102005 | Cu                                                    | 0.154978  | -0.061127 | -0.107269 |
| Cu                                                    | 3.419865  | 0.086804  | 0.101988  | Cu                                                    | 3.456760  | 0.061127  | 0.107283  |
| Cl                                                    | 2.012557  | 1.914284  | 0.039598  | Cl                                                    | 2.002710  | 1.857724  | 0.051904  |
| Cl                                                    | 1.598927  | -1.914312 | -0.039759 | Cl                                                    | 1.609024  | -1.857725 | -0.051860 |
| Cl                                                    | -0.454614 | -0.161566 | -2.280283 | Cl                                                    | -0.501628 | -0.137557 | -2.281942 |
| Cl                                                    | 4.065921  | 0.161540  | 2.280320  | Cl                                                    | 4.113389  | 0.137531  | 2.281949  |

|   |           |           |           |   |           |           |           |
|---|-----------|-----------|-----------|---|-----------|-----------|-----------|
| C | -0.332812 | 1.101987  | 2.453622  | C | -0.364363 | 1.112796  | 2.457469  |
| C | 0.825073  | -0.745605 | 3.070385  | C | 0.805285  | -0.731356 | 3.061174  |
| H | 1.743434  | -1.187797 | 2.692642  | H | 1.718611  | -1.172361 | 2.669638  |
| H | 0.133423  | -1.541006 | 3.356703  | H | 0.121760  | -1.529115 | 3.361053  |
| C | -1.792846 | 2.407074  | -0.355721 | C | -1.827913 | 2.434370  | -0.342982 |
| H | -1.969322 | 2.268254  | -1.409741 | H | -2.003493 | 2.304275  | -1.398538 |
| C | -2.135883 | 3.473515  | 0.506358  | C | -2.172976 | 3.494044  | 0.526595  |
| H | -2.673218 | 4.370537  | 0.259831  | H | -2.710610 | 4.392730  | 0.286023  |
| C | -1.627779 | 3.124477  | 1.728009  | C | -1.665235 | 3.136518  | 1.745904  |
| H | -1.625770 | 3.624467  | 2.681169  | H | -1.665349 | 3.630302  | 2.702614  |
| C | 1.125180  | 0.202595  | 4.233925  | C | 1.121196  | 0.219599  | 4.218480  |
| H | 2.096661  | 0.673978  | 4.103965  | H | 2.091367  | 0.690667  | 4.076242  |
| H | 1.057834  | -0.281864 | 5.203226  | H | 1.067756  | -0.264395 | 5.189020  |
| S | -0.156266 | 1.506692  | 4.136112  | S | -0.162642 | 1.522014  | 4.136525  |
| N | -1.140036 | 1.479579  | 0.303000  | N | -1.174342 | 1.502740  | 0.309085  |
| N | 0.191878  | 0.037007  | 2.011580  | N | 0.151859  | 0.045962  | 2.010958  |
| N | -1.038341 | 1.912885  | 1.572081  | N | -1.074195 | 1.926912  | 1.581818  |
| C | 3.944484  | -1.102064 | -2.453580 | C | 3.976052  | -1.112790 | -2.457467 |
| C | 2.786941  | 0.745696  | -3.070510 | C | 2.806443  | 0.731391  | -3.061157 |
| H | 1.868551  | 1.187986  | -2.692959 | H | 1.893125  | 1.172412  | -2.669621 |
| H | 3.478760  | 1.541022  | -3.356629 | H | 3.489987  | 1.529138  | -3.361026 |
| C | 5.404231  | -2.407157 | 0.355902  | C | 5.439589  | -2.434414 | 0.342966  |
| H | 5.580629  | -2.268319 | 1.409932  | H | 5.615183  | -2.304327 | 1.398520  |
| C | 5.747210  | -3.473676 | -0.506105 | C | 5.784600  | -3.494103 | -0.526614 |
| H | 6.284429  | -4.370746 | -0.259501 | H | 6.322199  | -4.392810 | -0.286048 |
| C | 5.239287  | -3.124605 | -1.727821 | C | 5.276853  | -3.136559 | -1.745916 |
| H | 5.237339  | -3.624610 | -2.680975 | H | 5.276929  | -3.630346 | -2.702624 |
| C | 2.486998  | -0.202379 | -4.234189 | C | 2.490516  | -0.219546 | -4.218474 |
| H | 1.515396  | -0.673588 | -4.104531 | H | 1.520334  | -0.690595 | -4.076243 |
| H | 2.554704  | 0.282128  | -5.203441 | H | 2.543967  | 0.264458  | -5.189009 |
| S | 3.768163  | -1.506732 | -4.136104 | S | 3.774326  | -1.521988 | -4.136527 |
| N | 4.751507  | -1.479652 | -0.302890 | N | 4.786053  | -1.502755 | -0.309094 |
| N | 3.419826  | -0.037040 | -2.011601 | N | 3.459850  | -0.045950 | -2.010946 |
| N | 4.649884  | -1.912988 | -1.571964 | N | 4.685870  | -1.926926 | -1.581825 |

Cu-( $\mu$ -Cl)-Cu bond angle ( $\alpha = 86^\circ$ )

E = -182658.40011 eV

|    |           |           |           |
|----|-----------|-----------|-----------|
| Cu | 0.114431  | -0.029708 | -0.120869 |
| Cu | 3.497294  | 0.029753  | 0.120846  |
| Cl | 2.011863  | 1.804156  | 0.079720  |
| Cl | 1.599861  | -1.804111 | -0.079743 |
| Cl | -0.532378 | -0.065811 | -2.298341 |
| Cl | 4.144092  | 0.065872  | 2.298320  |
| C  | -0.397909 | 1.126053  | 2.455992  |
| C  | 0.784073  | -0.714565 | 3.042879  |

Cu-( $\mu$ -Cl)-Cu bond angle ( $\alpha = 89^\circ$ )

E = -182658.37924 eV

|    |           |           |           |
|----|-----------|-----------|-----------|
| Cu | 0.072633  | 0.131024  | -0.143527 |
| Cu | 3.538986  | -0.131089 | 0.143552  |
| Cl | 2.155477  | 1.730132  | 0.181811  |
| Cl | 1.456146  | -1.730198 | -0.181793 |
| Cl | -0.526278 | 0.260771  | -2.333380 |
| Cl | 4.137852  | -0.260868 | 2.333413  |
| C  | -0.481336 | 1.197535  | 2.472833  |
| C  | 0.752562  | -0.621659 | 3.006227  |

|   |           |           |           |   |           |           |           |
|---|-----------|-----------|-----------|---|-----------|-----------|-----------|
| H | 1.688300  | -1.158513 | 2.634121  | H | 1.646911  | -1.060703 | 2.571970  |
| H | 0.107305  | -1.510081 | 3.362779  | H | 0.089876  | -1.418732 | 3.351270  |
| C | -1.873985 | 2.467010  | -0.329349 | C | -1.972686 | 2.588220  | -0.281219 |
| H | -2.048555 | 2.345823  | -1.385973 | H | -2.120457 | 2.506927  | -1.345710 |
| C | -2.224766 | 3.515208  | 0.551401  | C | -2.416275 | 3.562035  | 0.641441  |
| H | -2.767972 | 4.412873  | 0.320516  | H | -3.019315 | 4.428405  | 0.441299  |
| C | -1.713271 | 3.148446  | 1.766485  | C | -1.903581 | 3.171719  | 1.849187  |
| H | -1.714980 | 3.631303  | 2.728579  | H | -1.964956 | 3.602839  | 2.833715  |
| C | 1.126840  | 0.243125  | 4.186225  | C | 1.124210  | 0.342841  | 4.131207  |
| H | 2.091864  | 0.715786  | 4.017222  | H | 2.056772  | 0.856408  | 3.905782  |
| H | 1.099656  | -0.234933 | 5.160635  | H | 1.180509  | -0.135631 | 5.104083  |
| S | -0.163306 | 1.541080  | 4.129555  | S | -0.220082 | 1.586904  | 4.150605  |
| N | -1.213411 | 1.532720  | 0.312495  | N | -1.258264 | 1.672333  | 0.330180  |
| N | 0.106794  | 0.056738  | 2.002621  | N | 0.036518  | 0.148097  | 1.990505  |
| N | -1.114356 | 1.944753  | 1.589248  | N | -1.215008 | 2.025448  | 1.627274  |
| C | 4.009606  | -1.126062 | -2.455992 | C | 4.093028  | -1.197536 | -2.472821 |
| C | 2.827655  | 0.714563  | -3.042915 | C | 2.859182  | 0.621695  | -3.006209 |
| H | 1.923446  | 1.158547  | -2.634156 | H | 1.964808  | 1.060727  | -2.571994 |
| H | 3.504440  | 1.510052  | -3.362850 | H | 3.521899  | 1.418778  | -3.351167 |
| C | 5.485672  | -2.466990 | 0.329368  | C | 5.584301  | -2.588282 | 0.281239  |
| H | 5.660254  | -2.345781 | 1.385987  | H | 5.732045  | -2.507011 | 1.345735  |
| C | 5.836401  | -3.515228 | -0.551356 | C | 6.027912  | -3.562079 | -0.641430 |
| H | 6.379573  | -4.412908 | -0.320452 | H | 6.630943  | -4.428455 | -0.441291 |
| C | 5.324923  | -3.148472 | -1.766448 | C | 5.515252  | -3.171734 | -1.849181 |
| H | 5.326607  | -3.631354 | -2.728530 | H | 5.576653  | -3.602833 | -2.833716 |
| C | 2.484850  | -0.243155 | -4.186226 | C | 2.487601  | -0.342742 | -4.131267 |
| H | 1.519819  | -0.715792 | -4.017190 | H | 1.555010  | -0.856299 | -3.905942 |
| H | 2.512025  | 0.234874  | -5.160651 | H | 2.431390  | 0.135782  | -5.104121 |
| S | 3.774975  | -1.541129 | -4.129540 | S | 3.831866  | -1.586834 | -4.150623 |
| N | 4.825120  | -1.532696 | -0.312494 | N | 4.869898  | -1.672380 | -0.330159 |
| N | 3.504929  | -0.056725 | -2.002643 | N | 3.575149  | -0.148117 | -1.990478 |
| N | 4.726044  | -1.944756 | -1.589236 | N | 4.826674  | -2.025469 | -1.627260 |

Cu-( $\mu$ -Cl)-Cu bond angle ( $\alpha = 92^\circ$ )

E = -182658.34745 eV

|    |           |           |           |
|----|-----------|-----------|-----------|
| Cu | 0.031722  | 0.171613  | -0.162505 |
| Cu | 3.580044  | -0.171650 | 0.162552  |
| Cl | 2.174060  | 1.672746  | 0.235716  |
| Cl | 1.437703  | -1.672793 | -0.235590 |
| Cl | -0.546666 | 0.341218  | -2.352790 |
| Cl | 4.158490  | -0.341296 | 2.352818  |
| C  | -0.516603 | 1.205701  | 2.468732  |
| C  | 0.737664  | -0.605234 | 2.975999  |
| H  | 1.619828  | -1.048827 | 2.521424  |
| H  | 0.085143  | -1.399742 | 3.345687  |

Cu-( $\mu$ -Cl)-Cu bond angle ( $\alpha = 95^\circ$ )

E = -182658.29784 eV

|    |           |           |           |
|----|-----------|-----------|-----------|
| Cu | -0.013195 | 0.191838  | -0.178479 |
| Cu | 3.624842  | -0.191884 | 0.178504  |
| Cl | 2.173511  | 1.619503  | 0.286784  |
| Cl | 1.438142  | -1.619549 | -0.286773 |
| Cl | -0.568816 | 0.395841  | -2.370168 |
| Cl | 4.180432  | -0.395897 | 2.370200  |
| C  | -0.545403 | 1.204664  | 2.460812  |
| C  | 0.726412  | -0.599999 | 2.943747  |
| H  | 1.595209  | -1.044904 | 2.465223  |
| H  | 0.088460  | -1.394056 | 3.338908  |



|                                                       |           |           |           |                                                        |           |           |           |
|-------------------------------------------------------|-----------|-----------|-----------|--------------------------------------------------------|-----------|-----------|-----------|
| C                                                     | -2.018661 | 2.621186  | -0.268320 | C                                                      | -2.057174 | 2.641105  | -0.260958 |
| H                                                     | -2.164483 | 2.551838  | -1.333813 | H                                                      | -2.203897 | 2.580912  | -1.326867 |
| C                                                     | -2.465861 | 3.581782  | 0.665720  | C                                                      | -2.496304 | 3.597654  | 0.680422  |
| H                                                     | -3.072065 | 4.448186  | 0.475982  | H                                                      | -3.096981 | 4.469394  | 0.497944  |
| C                                                     | -1.951387 | 3.179099  | 1.869072  | C                                                      | -1.980918 | 3.183875  | 1.879859  |
| H                                                     | -2.013286 | 3.597998  | 2.858619  | H                                                      | -2.036911 | 3.596969  | 2.872108  |
| C                                                     | 1.138363  | 0.367812  | 4.082791  | C                                                      | 1.157911  | 0.381706  | 4.030901  |
| H                                                     | 2.056693  | 0.890557  | 3.822930  | H                                                      | 2.065537  | 0.906402  | 3.739656  |
| H                                                     | 1.232828  | -0.104351 | 5.055788  | H                                                      | 1.283234  | -0.083678 | 5.003656  |
| S                                                     | -0.219315 | 1.597547  | 4.139895  | S                                                      | -0.203406 | 1.606678  | 4.121046  |
| N                                                     | -1.301311 | 1.700145  | 0.332950  | N                                                      | -1.344469 | 1.711117  | 0.332729  |
| N                                                     | -0.006768 | 0.157518  | 1.975558  | N                                                      | -0.050440 | 0.152683  | 1.960489  |
| N                                                     | -1.259377 | 2.037888  | 1.633723  | N                                                      | -1.297578 | 2.039633  | 1.635729  |
| C                                                     | 4.128294  | -1.205666 | -2.468733 | C                                                      | 4.157098  | -1.204663 | -2.460798 |
| C                                                     | 2.874000  | 0.605275  | -2.975920 | C                                                      | 2.885346  | 0.600045  | -2.943738 |
| H                                                     | 1.991834  | 1.048833  | -2.521313 | H                                                      | 2.016535  | 1.044955  | -2.465248 |
| H                                                     | 3.526500  | 1.399809  | -3.345591 | H                                                      | 3.523340  | 1.394098  | -3.338839 |
| C                                                     | 5.630371  | -2.621265 | 0.268252  | C                                                      | 5.668769  | -2.641187 | 0.260981  |
| H                                                     | 5.776213  | -2.551952 | 1.333744  | H                                                      | 5.815461  | -2.581022 | 1.326895  |
| C                                                     | 6.077537  | -3.581838 | -0.665827 | C                                                      | 6.107962  | -3.597688 | -0.680419 |
| H                                                     | 6.683726  | -4.448261 | -0.476128 | H                                                      | 6.708658  | -4.469417 | -0.497954 |
| C                                                     | 5.563038  | -3.179116 | -1.869154 | C                                                      | 5.592542  | -3.183922 | -1.879844 |
| H                                                     | 5.624901  | -3.597991 | -2.858714 | H                                                      | 5.648536  | -3.597005 | -2.872098 |
| C                                                     | 2.473297  | -0.367736 | -4.082742 | C                                                      | 2.453883  | -0.381612 | -4.030952 |
| H                                                     | 1.554975  | -0.890501 | -3.822891 | H                                                      | 1.546227  | -0.906294 | -3.739780 |
| H                                                     | 2.378816  | 0.104459  | -5.055721 | H                                                      | 2.328629  | 0.083809  | -5.003698 |
| S                                                     | 3.830985  | -1.597457 | -4.139905 | S                                                      | 3.815170  | -1.606619 | -4.121061 |
| N                                                     | 4.913044  | -1.700180 | -0.332979 | N                                                      | 4.956106  | -1.711167 | -0.332706 |
| N                                                     | 3.618463  | -0.157500 | -1.975517 | N                                                      | 3.662128  | -0.152690 | -1.960465 |
| N                                                     | 4.871073  | -2.037887 | -1.633762 | N                                                      | 4.909236  | -2.039659 | -1.635712 |
| Cu-( $\mu$ -Cl)-Cu bond angle ( $\alpha = 98^\circ$ ) |           |           |           | Cu-( $\mu$ -Cl)-Cu bond angle ( $\alpha = 101^\circ$ ) |           |           |           |
| E = -182658.22996 eV                                  |           |           |           | E = -182658.14462 eV                                   |           |           |           |
| Cu                                                    | -0.063496 | 0.206286  | -0.195066 | Cu                                                     | -0.124050 | 0.229713  | -0.213995 |
| Cu                                                    | 3.675251  | -0.206263 | 0.195066  | Cu                                                     | 3.735814  | -0.229738 | 0.214025  |
| Cl                                                    | 2.177167  | 1.568318  | 0.334033  | Cl                                                     | 2.213939  | 1.517276  | 0.377986  |
| Cl                                                    | 1.434591  | -1.568296 | -0.334031 | Cl                                                     | 1.397819  | -1.517312 | -0.377906 |
| Cl                                                    | -0.594589 | 0.453547  | -2.386765 | Cl                                                     | -0.623778 | 0.531488  | -2.403703 |
| Cl                                                    | 4.206362  | -0.453517 | 2.386762  | Cl                                                     | 4.235593  | -0.531547 | 2.403716  |
| C                                                     | -0.571894 | 1.203513  | 2.449896  | C                                                      | -0.594258 | 1.216924  | 2.435778  |
| C                                                     | 0.714712  | -0.596971 | 2.906612  | C                                                      | 0.713254  | -0.579049 | 2.855479  |
| H                                                     | 1.567952  | -1.044652 | 2.403281  | H                                                      | 1.558992  | -1.010873 | 2.326745  |
| H                                                     | 0.090963  | -1.389361 | 3.327335  | H                                                      | 0.109738  | -1.383529 | 3.282115  |
| C                                                     | -2.099129 | 2.658712  | -0.253768 | C                                                      | -2.156201 | 2.685484  | -0.240993 |
| H                                                     | -2.249911 | 2.607691  | -1.319817 | H                                                      | -2.315708 | 2.642884  | -1.306161 |

|   |           |           |           |   |           |           |           |
|---|-----------|-----------|-----------|---|-----------|-----------|-----------|
| C | -2.527107 | 3.612640  | 0.694933  | C | -2.577809 | 3.630991  | 0.718504  |
| H | -3.122108 | 4.490083  | 0.520213  | H | -3.176394 | 4.508275  | 0.555901  |
| C | -2.008631 | 3.188526  | 1.889575  | C | -2.046809 | 3.199584  | 1.905195  |
| H | -2.056829 | 3.597499  | 2.884197  | H | -2.086210 | 3.601412  | 2.903100  |
| C | 1.179387  | 0.392465  | 3.972830  | C | 1.193802  | 0.405442  | 3.919811  |
| H | 2.077145  | 0.915871  | 3.650168  | H | 2.086876  | 0.930334  | 3.587512  |
| H | 1.335087  | -0.066944 | 4.944138  | H | 1.363860  | -0.059350 | 4.886035  |
| S | -0.180381 | 1.617398  | 4.096135  | S | -0.163566 | 1.630864  | 4.071998  |
| N | -1.389731 | 1.720421  | 0.331264  | N | -1.438995 | 1.744481  | 0.330552  |
| N | -0.093169 | 0.147399  | 1.942162  | N | -0.124726 | 0.162918  | 1.915581  |
| N | -1.334652 | 2.041145  | 1.636219  | N | -1.372556 | 2.055958  | 1.637607  |
| C | 4.183590  | -1.203512 | -2.449897 | C | 4.205941  | -1.216903 | -2.435780 |
| C | 2.897040  | 0.597013  | -2.906611 | C | 2.898431  | 0.579087  | -2.855414 |
| H | 2.043821  | 1.044725  | -2.403271 | H | 2.052710  | 1.010904  | -2.326643 |
| H | 3.520808  | 1.389379  | -3.327349 | H | 3.501936  | 1.383573  | -3.282054 |
| C | 5.710787  | -2.658759 | 0.253763  | C | 5.767913  | -2.685545 | 0.240929  |
| H | 5.861581  | -2.607738 | 1.319810  | H | 5.927445  | -2.642969 | 1.306095  |
| C | 6.138702  | -3.612721 | -0.694933 | C | 6.189480  | -3.631043 | -0.718595 |
| H | 6.733654  | -4.490195 | -0.520211 | H | 6.788049  | -4.508343 | -0.556021 |
| C | 5.620244  | -3.188583 | -1.889576 | C | 5.658464  | -3.199602 | -1.905266 |
| H | 5.668416  | -3.597564 | -2.884195 | H | 5.697837  | -3.601412 | -2.903179 |
| C | 2.432318  | -0.392415 | -3.972817 | C | 2.417846  | -0.405382 | -3.919749 |
| H | 1.534548  | -0.915790 | -3.650137 | H | 1.524778  | -0.930274 | -3.587434 |
| H | 2.276617  | 0.066991  | -4.944126 | H | 2.247763  | 0.059430  | -4.885959 |
| S | 3.792045  | -1.617393 | -4.096130 | S | 3.775201  | -1.630810 | -4.071996 |
| N | 5.001431  | -1.720437 | -0.331269 | N | 5.050719  | -1.744513 | -0.330582 |
| N | 3.704909  | -0.147376 | -1.942166 | N | 3.736438  | -0.162899 | -1.915555 |
| N | 4.946324  | -2.041168 | -1.636221 | N | 4.984245  | -2.055965 | -1.637643 |

Cu-( $\mu$ -Cl)-Cu bond angle ( $\alpha = 104^\circ$ )

E = -182658.04930 eV

|    |           |           |           |
|----|-----------|-----------|-----------|
| Cu | -0.205586 | 0.221342  | -0.249157 |
| Cu | 3.817257  | -0.221343 | 0.249157  |
| Cl | 2.261736  | 1.473099  | 0.433772  |
| Cl | 1.349940  | -1.473097 | -0.433783 |
| Cl | -0.688756 | 0.566735  | -2.428255 |
| Cl | 4.300425  | -0.566721 | 2.428258  |
| C  | -0.601665 | 1.219938  | 2.404469  |
| C  | 0.710856  | -0.580950 | 2.788758  |
| H  | 1.540481  | -1.013437 | 2.235787  |
| H  | 0.117513  | -1.385834 | 3.228591  |
| C  | -2.214874 | 2.700952  | -0.235144 |
| H  | -2.395582 | 2.662919  | -1.297109 |
| C  | -2.611184 | 3.646184  | 0.734878  |
| H  | -3.207641 | 4.527522  | 0.587221  |

|   |           |           |           |
|---|-----------|-----------|-----------|
| C | -2.057418 | 3.209140  | 1.909356  |
| H | -2.071922 | 3.608686  | 2.908814  |
| C | 1.220747  | 0.399112  | 3.843707  |
| H | 2.109386  | 0.919238  | 3.493474  |
| H | 1.407796  | -0.068294 | 4.805440  |
| S | -0.123679 | 1.635203  | 4.026097  |
| N | -1.491616 | 1.753934  | 0.319299  |
| N | -0.151406 | 0.163316  | 1.872093  |
| N | -1.396182 | 2.062228  | 1.625217  |
| C | 4.213360  | -1.219943 | -2.404466 |
| C | 2.900838  | 0.580943  | -2.788766 |
| H | 2.071201  | 1.013419  | -2.235805 |
| H | 3.494183  | 1.385835  | -3.228583 |
| C | 5.826550  | -2.700951 | 0.235164  |
| H | 6.007251  | -2.662914 | 1.297130  |
| C | 6.222862  | -3.646189 | -0.734851 |
| H | 6.819315  | -4.527528 | -0.587186 |
| C | 5.669119  | -3.209139 | -1.909339 |
| H | 5.683639  | -3.608683 | -2.908797 |
| C | 2.390970  | -0.399114 | -3.843731 |
| H | 1.502323  | -0.919243 | -3.493520 |
| H | 2.203940  | 0.068298  | -4.805466 |
| S | 3.735400  | -1.635202 | -4.026103 |
| N | 5.103289  | -1.753938 | -0.319286 |
| N | 3.763090  | -0.163324 | -1.872093 |
| N | 5.007870  | -2.062232 | -1.625205 |

Cu-Cl-Cu-Cl dihedral angle ( $\tau = 0^\circ$ )

E = -182658.40217 eV

|    |           |           |           |
|----|-----------|-----------|-----------|
| Cu | 0.141627  | -0.061806 | -0.107874 |
| Cu | 3.470104  | 0.061822  | 0.107876  |
| Cl | 1.993083  | 1.838599  | 0.055896  |
| Cl | 1.618644  | -1.838587 | -0.055895 |
| Cl | -0.516971 | -0.138268 | -2.281960 |
| Cl | 4.128696  | 0.138270  | 2.281961  |
| C  | -0.374438 | 1.109695  | 2.459477  |
| C  | 0.800673  | -0.732115 | 3.059470  |
| H  | 1.712975  | -1.171105 | 2.663135  |
| H  | 0.121520  | -1.531706 | 3.364295  |
| C  | -1.838324 | 2.435460  | -0.339018 |
| H  | -2.015360 | 2.306053  | -1.394406 |
| C  | -2.175830 | 3.497751  | 0.530277  |
| H  | -2.707811 | 4.399831  | 0.289859  |
| C  | -1.668971 | 3.137733  | 1.749252  |
| H  | -1.664259 | 3.632271  | 2.705550  |

Cu-Cl-Cu-Cl dihedral angle ( $\tau = 3^\circ$ )

E = -182658.39169 eV

|    |           |           |           |
|----|-----------|-----------|-----------|
| Cu | -0.136120 | 0.211240  | -0.129524 |
| Cu | 3.171533  | 0.280198  | -0.655394 |
| Cl | 1.649644  | 1.950458  | -1.146737 |
| Cl | 1.408577  | -1.395284 | 0.462164  |
| Cl | -1.188331 | -0.813915 | -1.857574 |
| Cl | 4.251785  | 1.282354  | 1.072432  |
| C  | -0.166148 | 2.455256  | 1.652900  |
| C  | 1.177919  | 1.033741  | 2.792436  |
| H  | 2.000894  | 0.398861  | 2.473348  |
| H  | 0.608993  | 0.519951  | 3.570836  |
| C  | -2.176192 | 2.446139  | -1.120681 |
| H  | -2.562092 | 1.858169  | -1.937562 |
| C  | -2.310234 | 3.823152  | -0.833485 |
| H  | -2.858757 | 4.560927  | -1.389494 |
| C  | -1.571632 | 4.025350  | 0.300577  |
| H  | -1.354528 | 4.908087  | 0.877051  |

|   |           |           |           |   |           |           |           |
|---|-----------|-----------|-----------|---|-----------|-----------|-----------|
| C | 1.121207  | 0.220804  | 4.214127  | C | 1.701330  | 2.392453  | 3.260063  |
| H | 2.090484  | 0.692368  | 4.067195  | H | 2.586040  | 2.675909  | 2.693964  |
| H | 1.072672  | -0.262124 | 5.185447  | H | 1.899695  | 2.426302  | 4.327089  |
| S | -0.164118 | 1.522046  | 4.136779  | S | 0.369243  | 3.583574  | 2.865011  |
| N | -1.189960 | 1.499984  | 0.312898  | N | -1.426149 | 1.860083  | -0.217034 |
| N | 0.139133  | 0.042044  | 2.012161  | N | 0.283700  | 1.272031  | 1.662402  |
| N | -1.085986 | 1.924191  | 1.585357  | N | -1.062090 | 2.819682  | 0.653968  |
| C | 3.986137  | -1.109691 | -2.459477 | C | 3.199636  | -1.915035 | -2.494994 |
| C | 2.811056  | 0.732134  | -3.059477 | C | 1.844206  | -0.465216 | -3.584039 |
| H | 1.898760  | 1.171141  | -2.663143 | H | 1.004903  | 0.140343  | -3.250788 |
| H | 3.490222  | 1.531713  | -3.364305 | H | 2.419857  | 0.092976  | -4.326148 |
| C | 5.449999  | -2.435478 | 0.339020  | C | 5.248602  | -1.968943 | 0.249366  |
| H | 5.627046  | -2.306069 | 1.394406  | H | 5.639702  | -1.402447 | 1.078776  |
| C | 5.787457  | -3.497791 | -0.530266 | C | 5.413226  | -3.329964 | -0.095262 |
| H | 6.319401  | -4.399891 | -0.289843 | H | 5.993564  | -4.073631 | 0.419338  |
| C | 5.280593  | -3.137770 | -1.749238 | C | 4.657578  | -3.508117 | -1.221840 |
| H | 5.275845  | -3.632322 | -2.705528 | H | 4.454709  | -4.373615 | -1.828983 |
| C | 2.490506  | -0.220784 | -4.214130 | C | 1.354817  | -1.809520 | -4.125687 |
| H | 1.521223  | -0.692333 | -4.067196 | H | 0.469992  | -2.139399 | -3.586190 |
| H | 2.539048  | 0.262141  | -5.185452 | H | 1.171189  | -1.794470 | -5.195728 |
| S | 3.775812  | -1.522044 | -4.136777 | S | 2.708075  | -2.990345 | -3.772810 |
| N | 4.801676  | -1.499977 | -0.312902 | N | 4.463354  | -1.369311 | -0.614119 |
| N | 3.472583  | -0.042030 | -2.012164 | N | 2.722273  | -0.742321 | -2.450638 |
| N | 4.697673  | -1.924196 | -1.585355 | N | 4.105136  | -2.304268 | -1.514408 |

Cu-Cl-Cu-Cl dihedral angle ( $\tau = 6^\circ$ )

E = -182658.37507 eV

|    |           |           |           |
|----|-----------|-----------|-----------|
| Cu | -0.200315 | 0.207916  | -0.128067 |
| Cu | 3.120516  | 0.229034  | -0.609639 |
| Cl | 1.653575  | 1.939204  | -1.137910 |
| Cl | 1.344781  | -1.349981 | 0.580152  |
| Cl | -1.224215 | -0.844055 | -1.853403 |
| Cl | 4.199863  | 1.232361  | 1.122322  |
| C  | -0.227982 | 2.532859  | 1.553967  |
| C  | 1.048188  | 1.129614  | 2.791333  |
| H  | 1.857501  | 0.457327  | 2.517160  |
| H  | 0.452853  | 0.668181  | 3.582628  |
| C  | -2.150759 | 2.445999  | -1.278293 |
| H  | -2.522635 | 1.830492  | -2.081307 |
| C  | -2.263113 | 3.836505  | -1.055555 |
| H  | -2.777719 | 4.559794  | -1.660874 |
| C  | -1.556141 | 4.072705  | 0.092014  |
| H  | -1.338211 | 4.975080  | 0.636756  |
| C  | 1.603353  | 2.493216  | 3.205005  |
| H  | 2.511043  | 2.721316  | 2.650211  |

Cu-Cl-Cu-Cl dihedral angle ( $\tau = 9^\circ$ )

E = -182658.36035 eV

|    |           |           |           |
|----|-----------|-----------|-----------|
| Cu | -0.169233 | 0.207579  | -0.198273 |
| Cu | 3.168667  | 0.249601  | -0.629699 |
| Cl | 1.692768  | 1.962371  | -1.118310 |
| Cl | 1.377046  | -1.316973 | 0.590919  |
| Cl | -1.170805 | -0.866097 | -1.923802 |
| Cl | 4.245358  | 1.252136  | 1.105098  |
| C  | -0.291272 | 2.561440  | 1.455657  |
| C  | 1.001870  | 1.210579  | 2.731078  |
| H  | 1.818541  | 0.539444  | 2.475838  |
| H  | 0.413250  | 0.766932  | 3.537327  |
| C  | -2.148532 | 2.392605  | -1.416108 |
| H  | -2.485739 | 1.758900  | -2.220157 |
| C  | -2.309595 | 3.780329  | -1.208061 |
| H  | -2.835463 | 4.481106  | -1.829945 |
| C  | -1.633954 | 4.048468  | -0.048524 |
| H  | -1.457591 | 4.962042  | 0.492412  |
| C  | 1.541492  | 2.592042  | 3.102342  |
| H  | 2.441880  | 2.818826  | 2.534883  |

|   |           |           |           |   |           |           |           |
|---|-----------|-----------|-----------|---|-----------|-----------|-----------|
| H | 1.774651  | 2.574460  | 4.274008  | H | 1.720565  | 2.705642  | 4.167133  |
| S | 0.322994  | 3.705482  | 2.714479  | S | 0.240137  | 3.771586  | 2.588116  |
| N | -1.443599 | 1.885013  | -0.325590 | N | -1.442451 | 1.862478  | -0.444683 |
| N | 0.179627  | 1.337003  | 1.635611  | N | 0.129891  | 1.373274  | 1.570283  |
| N | -1.085946 | 2.873309  | 0.514156  | N | -1.134451 | 2.868279  | 0.393039  |
| C | 3.203223  | -1.948322 | -2.479400 | C | 3.223454  | -1.946613 | -2.468252 |
| C | 1.819152  | -0.510331 | -3.547815 | C | 1.885588  | -0.489275 | -3.570724 |
| H | 0.959504  | 0.067546  | -3.218061 | H | 1.029026  | 0.102364  | -3.257055 |
| H | 2.397040  | 0.079702  | -4.263304 | H | 2.483256  | 0.090678  | -4.278073 |
| C | 5.259418  | -1.983528 | 0.260025  | C | 5.233447  | -1.994751 | 0.303602  |
| H | 5.623183  | -1.420642 | 1.104392  | H | 5.602048  | -1.426271 | 1.142170  |
| C | 5.511641  | -3.316344 | -0.139526 | C | 5.435793  | -3.347029 | -0.057253 |
| H | 6.151342  | -4.035927 | 0.337739  | H | 6.031057  | -4.081384 | 0.453603  |
| C | 4.758068  | -3.502002 | -1.266222 | C | 4.697246  | -3.529941 | -1.194062 |
| H | 4.615629  | -4.352424 | -1.910899 | H | 4.527322  | -4.391518 | -1.816626 |
| C | 1.377336  | -1.852383 | -4.133075 | C | 1.433572  | -1.826268 | -4.160488 |
| H | 0.495823  | -2.225776 | -3.616626 | H | 0.533108  | -2.180590 | -3.664057 |
| H | 1.207698  | -1.812399 | -5.204813 | H | 1.290573  | -1.788086 | -5.236152 |
| S | 2.763532  | -2.999989 | -3.796171 | S | 2.788483  | -2.998528 | -3.786066 |
| N | 4.425015  | -1.407442 | -0.571959 | N | 4.442013  | -1.405524 | -0.560369 |
| N | 2.683335  | -0.794960 | -2.405624 | N | 2.724812  | -0.782409 | -2.412794 |
| N | 4.118386  | -2.329310 | -1.504031 | N | 4.115464  | -2.336682 | -1.476181 |

Cu-Cl-Cu-Cl dihedral angle ( $\tau = 12^\circ$ )

E = -182658.33620 eV

|    |           |           |           |
|----|-----------|-----------|-----------|
| Cu | -0.148194 | 0.199667  | -0.272487 |
| Cu | 3.221908  | 0.281374  | -0.642224 |
| Cl | 1.762913  | 2.016367  | -1.091056 |
| Cl | 1.401797  | -1.286481 | 0.578380  |
| Cl | -1.112663 | -0.897506 | -2.001685 |
| Cl | 4.293810  | 1.274913  | 1.098907  |
| C  | -0.347544 | 2.575920  | 1.344451  |
| C  | 0.967319  | 1.276625  | 2.650532  |
| H  | 1.796149  | 0.616110  | 2.406262  |
| H  | 0.390751  | 0.838397  | 3.468254  |
| C  | -2.150839 | 2.324790  | -1.556559 |
| H  | -2.452909 | 1.674980  | -2.361524 |
| C  | -2.373654 | 3.704661  | -1.354673 |
| H  | -2.923813 | 4.379640  | -1.983964 |
| C  | -1.724585 | 4.004655  | -0.187374 |
| H  | -1.598815 | 4.925985  | 0.354519  |
| C  | 1.482952  | 2.675721  | 2.990029  |
| H  | 2.379792  | 2.905349  | 2.417634  |
| H  | 1.660794  | 2.816489  | 4.051805  |
| S  | 0.161522  | 3.821521  | 2.449069  |

Cu-Cl-Cu-Cl dihedral angle ( $\tau = 15^\circ$ )

E = -182658.31028 eV

|    |           |           |           |
|----|-----------|-----------|-----------|
| Cu | 0.038578  | 0.161227  | -0.294428 |
| Cu | 3.370436  | 0.349352  | -0.644613 |
| Cl | 1.911153  | 2.092198  | -1.076247 |
| Cl | 1.576836  | -1.267125 | 0.639435  |
| Cl | -0.616369 | -1.046278 | -2.095049 |
| Cl | 4.456613  | 1.325718  | 1.084399  |
| C  | -0.354602 | 2.555933  | 1.223334  |
| C  | 1.154512  | 1.463206  | 2.505518  |
| H  | 2.008471  | 0.838453  | 2.255297  |
| H  | 0.668840  | 1.066134  | 3.399958  |
| C  | -2.266338 | 1.992309  | -1.567476 |
| H  | -2.515794 | 1.292405  | -2.348027 |
| C  | -2.692789 | 3.321323  | -1.352167 |
| H  | -3.384377 | 3.895041  | -1.941165 |
| C  | -2.020369 | 3.734849  | -0.233247 |
| H  | -2.010045 | 4.668682  | 0.302754  |
| C  | 1.593778  | 2.916251  | 2.684447  |
| H  | 2.410992  | 3.155358  | 2.006057  |
| H  | 1.861535  | 3.157342  | 3.708766  |
| S  | 0.137410  | 3.915286  | 2.193247  |

|   |           |           |           |
|---|-----------|-----------|-----------|
| N | -1.433409 | 1.828970  | -0.574943 |
| N | 0.089159  | 1.396668  | 1.488923  |
| N | -1.179261 | 2.848688  | 0.262909  |
| C | 3.242662  | -1.935489 | -2.446582 |
| C | 1.970474  | -0.447938 | -3.588432 |
| H | 1.119549  | 0.160867  | -3.292031 |
| H | 2.594143  | 0.121661  | -4.281167 |
| C | 5.200261  | -2.010791 | 0.360975  |
| H | 5.576538  | -1.441789 | 1.195857  |
| C | 5.348899  | -3.378395 | 0.033035  |
| H | 5.899584  | -4.127360 | 0.572091  |
| C | 4.624921  | -3.553265 | -1.114326 |
| H | 4.425559  | -4.420675 | -1.719734 |
| C | 1.503700  | -1.774809 | -4.191587 |
| H | 0.576052  | -2.102794 | -3.729099 |
| H | 1.403478  | -1.736396 | -5.271944 |
| S | 2.808137  | -2.985315 | -3.764350 |
| N | 4.453882  | -1.405922 | -0.531669 |
| N | 2.777159  | -0.756422 | -2.412578 |
| N | 4.104001  | -2.341183 | -1.434365 |

Cu-Cl-Cu-Cl dihedral angle ( $\tau = 18^\circ$ )

E = -182658.28172 eV

|    |           |           |           |
|----|-----------|-----------|-----------|
| Cu | 0.030016  | 0.152809  | -0.345182 |
| Cu | 3.375509  | 0.355563  | -0.638768 |
| Cl | 1.973073  | 2.133344  | -1.096619 |
| Cl | 1.556560  | -1.210200 | 0.682521  |
| Cl | -0.579955 | -1.088272 | -2.133205 |
| Cl | 4.459117  | 1.325076  | 1.098181  |
| C  | -0.384541 | 2.589762  | 1.103056  |
| C  | 1.109423  | 1.538005  | 2.434668  |
| H  | 1.967621  | 0.906741  | 2.218721  |
| H  | 0.608773  | 1.166894  | 3.332237  |
| C  | -2.261542 | 1.938989  | -1.693339 |
| H  | -2.493789 | 1.217643  | -2.459749 |
| C  | -2.715807 | 3.262718  | -1.505511 |
| H  | -3.417148 | 3.810461  | -2.107501 |
| C  | -2.056271 | 3.711434  | -0.391909 |
| H  | -2.066298 | 4.655512  | 0.125991  |
| C  | 1.544312  | 2.995316  | 2.577252  |
| H  | 2.367505  | 3.216497  | 1.899911  |
| H  | 1.800717  | 3.265010  | 3.597269  |
| S  | 0.090347  | 3.976126  | 2.042919  |
| N  | -1.402575 | 1.611842  | -0.754577 |
| N  | 0.156405  | 1.468617  | 1.326529  |

|   |           |           |           |
|---|-----------|-----------|-----------|
| N | -1.411172 | 1.628768  | -0.638891 |
| N | 0.185296  | 1.426985  | 1.410827  |
| N | -1.265036 | 2.688584  | 0.176895  |
| C | 3.217502  | -1.860770 | -2.424317 |
| C | 2.250027  | -0.218720 | -3.662511 |
| H | 1.406120  | 0.420238  | -3.412857 |
| H | 2.967283  | 0.358986  | -4.247999 |
| C | 4.972132  | -2.145450 | 0.499369  |
| H | 5.415033  | -1.617610 | 1.328043  |
| C | 4.812253  | -3.531703 | 0.276628  |
| H | 5.129158  | -4.341194 | 0.908275  |
| C | 4.140710  | -3.627777 | -0.911026 |
| H | 3.773769  | -4.472681 | -1.468235 |
| C | 1.777204  | -1.474385 | -4.415477 |
| H | 0.736895  | -1.692541 | -4.196477 |
| H | 1.939556  | -1.401738 | -5.486541 |
| S | 2.778947  | -2.861854 | -3.773357 |
| N | 4.449668  | -1.456774 | -0.487928 |
| N | 2.908432  | -0.630931 | -2.429176 |
| N | 3.947091  | -2.359747 | -1.352975 |

Cu-Cl-Cu-Cl dihedral angle ( $\tau = 21^\circ$ )

E = -182658.25764 eV

|    |           |           |           |
|----|-----------|-----------|-----------|
| Cu | -0.057051 | 0.117386  | -0.301508 |
| Cu | 3.273952  | 0.314445  | -0.578520 |
| Cl | 1.940777  | 2.129744  | -1.079211 |
| Cl | 1.437573  | -1.185649 | 0.832887  |
| Cl | -0.624152 | -1.155252 | -2.078983 |
| Cl | 4.364018  | 1.281731  | 1.158860  |
| C  | -0.437190 | 2.646177  | 1.000847  |
| C  | 0.987423  | 1.635206  | 2.434273  |
| H  | 1.825148  | 0.959303  | 2.282116  |
| H  | 0.453591  | 1.345845  | 3.342386  |
| C  | -2.208748 | 1.908367  | -1.841427 |
| H  | -2.431740 | 1.154972  | -2.579202 |
| C  | -2.595028 | 3.263497  | -1.763991 |
| H  | -3.224357 | 3.809348  | -2.442360 |
| C  | -1.976935 | 3.747013  | -0.641143 |
| H  | -1.956136 | 4.723673  | -0.188736 |
| C  | 1.474192  | 3.081244  | 2.484377  |
| H  | 2.309301  | 3.228635  | 1.801346  |
| H  | 1.731328  | 3.409931  | 3.486645  |
| S  | 0.060492  | 4.071174  | 1.866565  |
| N  | -1.429908 | 1.595177  | -0.830399 |
| N  | 0.057179  | 1.523274  | 1.307755  |

|   |           |           |           |   |           |           |           |
|---|-----------|-----------|-----------|---|-----------|-----------|-----------|
| N | -1.281169 | 2.689927  | 0.040691  | N | -1.295149 | 2.713441  | -0.095413 |
| C | 3.219097  | -1.868014 | -2.402940 | C | 3.205020  | -1.894543 | -2.383890 |
| C | 2.284037  | -0.223502 | -3.663211 | C | 2.216167  | -0.263169 | -3.615236 |
| H | 1.436053  | 0.416721  | -3.431346 | H | 1.351791  | 0.357847  | -3.392875 |
| H | 3.014218  | 0.355114  | -4.231360 | H | 2.946947  | 0.334941  | -4.163088 |
| C | 4.950782  | -2.148695 | 0.535120  | C | 4.977537  | -2.157271 | 0.530919  |
| H | 5.390474  | -1.619594 | 1.364708  | H | 5.382488  | -1.626486 | 1.376968  |
| C | 4.794603  | -3.535444 | 0.311991  | C | 4.975310  | -3.538695 | 0.227012  |
| H | 5.111750  | -4.344057 | 0.944661  | H | 5.406531  | -4.339408 | 0.799214  |
| C | 4.128473  | -3.633614 | -0.878544 | C | 4.293587  | -3.644945 | -0.953717 |
| H | 3.767851  | -4.479654 | -1.438284 | H | 4.023308  | -4.492575 | -1.560122 |
| C | 1.827886  | -1.477737 | -4.430122 | C | 1.802904  | -1.518758 | -4.399908 |
| H | 0.779488  | -1.689290 | -4.247461 | H | 0.771308  | -1.786159 | -4.193531 |
| H | 2.027755  | -1.407472 | -5.495056 | H | 1.969816  | -1.415370 | -5.467922 |
| S | 2.798479  | -2.871192 | -3.755493 | S | 2.862462  | -2.872574 | -3.777094 |
| N | 4.431213  | -1.461374 | -0.454630 | N | 4.353988  | -1.481526 | -0.403555 |
| N | 2.915322  | -0.636816 | -2.416768 | N | 2.834810  | -0.681776 | -2.363255 |
| N | 3.933255  | -2.365809 | -1.320837 | N | 3.935420  | -2.385407 | -1.310036 |

Model I for F<sup>-</sup>.

E= -143434.32070 eV

|    |           |           |           |
|----|-----------|-----------|-----------|
| Cu | 0.335484  | -0.101645 | -0.247404 |
| Cu | 3.276314  | 0.101234  | 0.247649  |
| F  | 1.900928  | 1.414604  | 0.100149  |
| F  | 1.710994  | -1.414855 | -0.099595 |
| F  | -0.009955 | -0.090526 | -2.072411 |
| F  | 3.621822  | 0.089791  | 2.072650  |
| C  | -0.233609 | 1.018366  | 2.297851  |
| C  | 0.919147  | -0.837406 | 2.892498  |
| H  | 1.797667  | -1.303742 | 2.454529  |
| H  | 0.234532  | -1.604958 | 3.262265  |
| C  | -1.709502 | 2.376284  | -0.485019 |
| H  | -1.885163 | 2.271528  | -1.542600 |
| C  | -2.081646 | 3.407085  | 0.406649  |
| H  | -2.641197 | 4.297605  | 0.187035  |
| C  | -1.565392 | 3.031495  | 1.617867  |
| H  | -1.581250 | 3.499379  | 2.587176  |
| C  | 1.335792  | 0.144627  | 3.989381  |
| H  | 2.297574  | 0.585900  | 3.738662  |
| H  | 1.346964  | -0.301672 | 4.979336  |
| S  | 0.065246  | 1.465678  | 3.954785  |
| N  | -1.035776 | 1.443405  | 0.144382  |
| N  | 0.221930  | -0.076587 | 1.860720  |
| N  | -0.945357 | 1.842620  | 1.425183  |
| C  | 3.845175  | -1.018262 | -2.297896 |

Model I for Cl<sup>-</sup>.

E= -182658.40366 eV

|    |           |          |           |
|----|-----------|----------|-----------|
| Cu | 2.163254  | 3.444815 | 0.082750  |
| Cu | -1.108554 | 4.312179 | -0.082775 |
| Cl | 0.005904  | 3.234728 | 1.642135  |
| Cl | 1.049025  | 4.523090 | -1.641818 |
| Cl | 2.511432  | 1.397575 | -0.852280 |
| Cl | -1.457914 | 6.359373 | 0.851923  |
| C  | 2.905981  | 5.129503 | 2.285582  |
| C  | 1.983833  | 6.638307 | 0.874093  |
| H  | 1.095447  | 6.620264 | 0.248303  |
| H  | 2.780926  | 7.174087 | 0.353402  |
| C  | 3.871635  | 1.841891 | 2.277604  |
| H  | 3.901141  | 0.927496 | 1.707681  |
| C  | 4.298917  | 2.124817 | 3.594860  |
| H  | 4.761401  | 1.453013 | 4.294394  |
| C  | 3.984350  | 3.441282 | 3.798616  |
| H  | 4.105219  | 4.092483 | 4.647393  |
| C  | 1.667789  | 7.256401 | 2.234823  |
| H  | 0.658201  | 6.998112 | 2.548176  |
| H  | 1.811433  | 8.332390 | 2.259713  |
| S  | 2.845371  | 6.469825 | 3.396383  |
| N  | 3.350523  | 2.912577 | 1.726061  |
| N  | 2.445440  | 5.272065 | 1.114460  |
| N  | 3.419385  | 3.888239 | 2.650054  |
| C  | -1.850466 | 2.626705 | -2.285275 |

|   |          |           |           |   |           |           |           |
|---|----------|-----------|-----------|---|-----------|-----------|-----------|
| C | 2.692030 | 0.837446  | -2.891970 | C | -0.926985 | 1.118777  | -0.873691 |
| H | 1.813624 | 1.303690  | -2.453683 | H | -0.038435 | 1.137685  | -0.248129 |
| H | 3.376454 | 1.605069  | -3.261921 | H | -1.723496 | 0.582408  | -0.352719 |
| C | 5.321856 | -2.376378 | 0.484443  | C | -2.817057 | 5.914076  | -2.278252 |
| H | 5.497654 | -2.271804 | 1.542019  | H | -2.846843 | 6.828625  | -1.708593 |
| C | 5.694132 | -3.406894 | -0.407499 | C | -3.244128 | 5.630671  | -3.595475 |
| H | 6.253961 | -4.297307 | -0.188159 | H | -3.706650 | 6.302179  | -4.295267 |
| C | 5.177582 | -3.031191 | -1.618555 | C | -2.929275 | 4.314209  | -3.798809 |
| H | 5.193457 | -3.498843 | -2.587976 | H | -3.049865 | 3.662752  | -4.647429 |
| C | 2.275041 | -0.144599 | -3.988730 | C | -0.610707 | 0.500754  | -2.234408 |
| H | 1.313408 | -0.586015 | -3.737663 | H | 0.398615  | 0.759830  | -2.547996 |
| H | 2.263375 | 0.301761  | -4.978653 | H | -0.753477 | -0.575356 | -2.259124 |
| S | 3.545814 | -1.465443 | -3.954776 | S | -1.789178 | 1.286208  | -3.395823 |
| N | 4.647796 | -1.443531 | -0.144655 | N | -2.295810 | 4.843655  | -1.726327 |
| N | 3.389648 | 0.076572  | -1.860507 | N | -1.389743 | 2.484614  | -1.114162 |
| N | 4.557271 | -1.842517 | -1.425522 | N | -2.364341 | 3.867699  | -2.650054 |

Model I for Br.

E= -412757.69524 eV

|    |           |           |           |
|----|-----------|-----------|-----------|
| Cu | 0.064254  | 0.010599  | -0.100277 |
| Cu | 3.547578  | -0.010386 | 0.100166  |
| Br | 2.102331  | 1.991771  | 0.098282  |
| Br | 1.509472  | -1.991580 | -0.098493 |
| Br | -0.685547 | -0.012258 | -2.417254 |
| Br | 4.297358  | 0.012580  | 2.417146  |
| C  | -0.438100 | 1.166307  | 2.483807  |
| C  | 0.766617  | -0.664037 | 3.057002  |
| H  | 1.683767  | -1.089981 | 2.657176  |
| H  | 0.099901  | -1.476207 | 3.355582  |
| C  | -1.928490 | 2.517717  | -0.288411 |
| H  | -2.105720 | 2.408448  | -1.346024 |
| C  | -2.300502 | 3.546297  | 0.605978  |
| H  | -2.862540 | 4.435079  | 0.385108  |
| C  | -1.783220 | 3.173973  | 1.816515  |
| H  | -1.797668 | 3.643560  | 2.785230  |
| C  | 1.079138  | 0.281895  | 4.218531  |
| H  | 2.038328  | 0.773659  | 4.069372  |
| H  | 1.051106  | -0.211386 | 5.185386  |
| S  | -0.230239 | 1.558797  | 4.165538  |
| N  | -1.248613 | 1.587737  | 0.341029  |
| N  | 0.092218  | 0.113391  | 2.019284  |
| N  | -1.159618 | 1.984953  | 1.623661  |
| C  | 4.049840  | -1.166326 | -2.483818 |
| C  | 2.845151  | 0.663988  | -3.057162 |
| H  | 1.928060  | 1.090030  | -2.657301 |

Model I for I.

E= -164952.75029 eV

|    |           |           |           |
|----|-----------|-----------|-----------|
| Cu | -0.115493 | 0.116944  | -0.114724 |
| Cu | 3.727205  | -0.116883 | 0.114692  |
| I  | 2.296989  | 2.113426  | 0.226828  |
| I  | 1.314718  | -2.113367 | -0.226887 |
| I  | -1.001347 | 0.136050  | -2.608198 |
| I  | 4.613039  | -0.135955 | 2.608172  |
| C  | -0.552887 | 1.239304  | 2.497156  |
| C  | 0.730693  | -0.557341 | 2.999100  |
| H  | 1.653714  | -0.937343 | 2.567076  |
| H  | 0.112500  | -1.406916 | 3.296658  |
| C  | -2.096056 | 2.651661  | -0.217453 |
| H  | -2.281191 | 2.581388  | -1.276845 |
| C  | -2.494549 | 3.630779  | 0.718580  |
| H  | -3.083660 | 4.510041  | 0.534276  |
| C  | -1.961262 | 3.225868  | 1.911170  |
| H  | -1.987617 | 3.654431  | 2.898260  |
| C  | 1.040344  | 0.377112  | 4.169493  |
| H  | 1.976947  | 0.906868  | 4.005443  |
| H  | 1.062361  | -0.136296 | 5.125738  |
| S  | -0.314325 | 1.606023  | 4.180667  |
| N  | -1.382632 | 1.717197  | 0.370217  |
| N  | -0.006845 | 0.210618  | 1.997868  |
| N  | -1.301930 | 2.065624  | 1.668827  |
| C  | 4.164593  | -1.239315 | -2.497159 |
| C  | 2.881037  | 0.557331  | -2.999154 |
| H  | 1.958028  | 0.937367  | -2.567133 |



|   |          |           |           |   |          |           |           |
|---|----------|-----------|-----------|---|----------|-----------|-----------|
| H | 3.511874 | 1.476082  | -3.355935 | H | 3.499245 | 1.406881  | -3.296751 |
| C | 5.540182 | -2.517589 | 0.288499  | C | 5.707720 | -2.651632 | 0.217494  |
| H | 5.717437 | -2.408236 | 1.346098  | H | 5.892849 | -2.581336 | 1.276885  |
| C | 5.912084 | -3.546288 | -0.605800 | C | 6.106197 | -3.630784 | -0.718511 |
| H | 6.474043 | -4.435101 | -0.384857 | H | 6.695289 | -4.510053 | -0.534180 |
| C | 5.394816 | -3.174029 | -1.816363 | C | 5.572920 | -3.225896 | -1.911114 |
| H | 5.409195 | -3.643713 | -2.785032 | H | 5.599265 | -3.654490 | -2.898191 |
| C | 2.532473 | -0.282104 | -4.218512 | C | 2.571357 | -0.377162 | -4.169505 |
| H | 1.573291 | -0.773822 | -4.069168 | H | 1.634755 | -0.906908 | -4.005416 |
| H | 2.560405 | 0.211030  | -5.185446 | H | 2.549323 | 0.136210  | -5.125770 |
| S | 3.841823 | -1.559032 | -4.165476 | S | 3.926018 | -1.606083 | -4.180657 |
| N | 4.860384 | -1.587606 | -0.341021 | N | 4.994325 | -1.717165 | -0.370207 |
| N | 3.519623 | -0.113314 | -2.019392 | N | 3.618569 | -0.210605 | -1.997900 |
| N | 4.771330 | -1.984933 | -1.623613 | N | 4.913619 | -2.065627 | -1.668806 |

Model I for N<sub>3</sub><sup>-</sup>.

E= -412757.69524 eV

|    |           |           |           |
|----|-----------|-----------|-----------|
| Cu | 0.180632  | 0.259433  | -0.091656 |
| Cu | 3.324258  | 0.031923  | -0.128809 |
| C  | -0.235156 | 1.160223  | 2.634875  |
| C  | 0.802273  | -0.837767 | 2.942646  |
| H  | 1.816474  | -1.108425 | 2.652476  |
| H  | 0.173357  | -1.720511 | 2.820112  |
| C  | -1.470776 | 3.022542  | 0.039317  |
| H  | -1.633956 | 3.072854  | -1.024566 |
| C  | -1.783746 | 3.950135  | 1.058347  |
| H  | -2.248284 | 4.912816  | 0.950278  |
| C  | -1.350954 | 3.367763  | 2.217100  |
| H  | -1.352545 | 3.701042  | 3.240539  |
| C  | 0.756049  | -0.304031 | 4.391844  |
| H  | 1.734335  | 0.012980  | 4.737152  |
| H  | 0.327538  | -1.024659 | 5.082411  |
| S  | -0.314775 | 1.174397  | 4.367861  |
| N  | -0.898951 | 1.956258  | 0.546918  |
| N  | 0.314161  | 0.189687  | 2.033192  |
| N  | -0.824678 | 2.164790  | 1.874967  |
| C  | 4.029692  | -1.388064 | -2.551056 |
| C  | 2.582385  | 0.162293  | -3.340224 |
| H  | 1.606294  | 0.493858  | -2.989908 |
| H  | 3.119296  | 1.032741  | -3.723503 |
| C  | 5.512322  | -2.251275 | 0.419582  |
| H  | 5.603573  | -2.020745 | 1.468441  |
| C  | 6.103313  | -3.276538 | -0.350954 |
| H  | 6.781610  | -4.040605 | -0.018501 |
| C  | 5.619753  | -3.094511 | -1.619246 |

Model II for F<sup>-</sup>.

E= -163046.55293 eV

|    |           |           |           |
|----|-----------|-----------|-----------|
| Cu | 0.002380  | -0.050710 | 0.128319  |
| Cu | 2.984828  | 0.050310  | -0.128104 |
| F  | 1.623471  | 1.368646  | -0.077008 |
| F  | 1.363814  | -1.369009 | 0.077098  |
| C  | -0.073181 | 1.282076  | 2.659606  |
| C  | 1.036899  | -0.613541 | 3.212259  |
| H  | 1.862668  | -1.120517 | 2.716316  |
| H  | 0.359703  | -1.359884 | 3.634452  |
| C  | -1.804247 | 2.574170  | -0.003393 |
| H  | -2.147217 | 2.403117  | -1.010872 |
| C  | -1.925503 | 3.710850  | 0.827593  |
| H  | -2.406756 | 4.644272  | 0.600270  |
| C  | -1.286442 | 3.372340  | 1.989283  |
| H  | -1.109693 | 3.914778  | 2.901983  |
| C  | 1.555230  | 0.361199  | 4.277588  |
| H  | 2.533638  | 0.746099  | 4.001663  |
| H  | 1.574426  | -0.074189 | 5.272169  |
| S  | 0.376750  | 1.762773  | 4.273590  |
| N  | -1.152283 | 1.619908  | 0.615919  |
| N  | 0.294921  | 0.154286  | 2.223240  |
| N  | -0.835224 | 2.103371  | 1.831095  |
| C  | 3.062572  | -1.281290 | -2.660200 |
| C  | 1.949426  | 0.612770  | -3.211834 |
| H  | 1.123313  | 1.118896  | -2.715624 |
| H  | 2.625724  | 1.359755  | -3.634352 |
| C  | 4.794503  | -2.572404 | 0.002720  |
| H  | 5.136554  | -2.401464 | 1.010532  |
| C  | 4.917926  | -3.708375 | -0.828903 |

|   |           |           |           |    |           |           |           |
|---|-----------|-----------|-----------|----|-----------|-----------|-----------|
| H | 5.772909  | -3.634924 | -2.537406 | H  | 5.400487  | -4.641194 | -0.601884 |
| C | 2.460141  | -0.946538 | -4.389819 | C  | 4.279415  | -3.369927 | -1.990929 |
| H | 1.610873  | -1.593778 | -4.188758 | H  | 4.104415  | -3.911891 | -2.904250 |
| H | 2.409255  | -0.565780 | -5.404967 | C  | 1.431811  | -0.362649 | -4.276790 |
| S | 3.977075  | -1.952883 | -4.194931 | H  | 0.454615  | -0.749732 | -3.999572 |
| N | 4.735634  | -1.503859 | -0.330456 | H  | 1.410319  | 0.072919  | -5.271238 |
| N | 3.341602  | -0.377521 | -2.214173 | S  | 2.613428  | -1.761585 | -4.274546 |
| N | 4.803264  | -2.013792 | -1.573651 | N  | 4.141078  | -1.618901 | -0.616218 |
| N | -0.781766 | 0.317150  | -1.812054 | N  | 2.692623  | -0.154347 | -2.223138 |
| N | 3.856980  | 0.216549  | 1.770602  | N  | 3.825667  | -2.101945 | -1.831986 |
| N | -0.696408 | -0.295991 | -2.829116 | Cl | -1.152041 | -0.483520 | -1.784031 |
| N | 3.332930  | 0.987911  | 2.517230  | Cl | 4.138679  | 0.482530  | 1.784840  |
| N | -0.646048 | -0.835068 | -3.831620 |    |           |           |           |
| N | 2.847456  | 1.693704  | 3.267052  |    |           |           |           |
| N | 2.062656  | 1.570308  | -0.367102 |    |           |           |           |
| N | 1.391763  | -1.360912 | -0.157353 |    |           |           |           |
| N | 1.989206  | 2.639975  | 0.182783  |    |           |           |           |
| N | 1.450968  | -2.202218 | -1.011906 |    |           |           |           |
| N | 1.860586  | 3.655538  | 0.661024  |    |           |           |           |
| N | 1.566317  | -3.005744 | -1.802742 |    |           |           |           |

Model II for Br.

E= -297708.00355 eV

|    |           |           |           |
|----|-----------|-----------|-----------|
| Cu | 0.005640  | -0.148703 | -0.005665 |
| Cu | 3.483230  | 0.148451  | 0.005825  |
| Br | 1.965776  | 2.091921  | 0.004569  |
| Br | 1.523125  | -2.092157 | -0.004423 |
| C  | -0.302808 | 1.166523  | 2.514578  |
| C  | 0.939776  | -0.635802 | 3.100446  |
| H  | 1.823161  | -1.089750 | 2.658129  |
| H  | 0.292195  | -1.424913 | 3.489758  |
| C  | -1.929846 | 2.379029  | -0.239770 |
| H  | -2.175956 | 2.200989  | -1.273989 |
| C  | -2.166521 | 3.501691  | 0.585378  |
| H  | -2.674537 | 4.412279  | 0.326016  |
| C  | -1.598114 | 3.187365  | 1.789542  |
| H  | -1.509753 | 3.733847  | 2.712694  |
| C  | 1.335748  | 0.373636  | 4.177855  |
| H  | 2.275101  | 0.859021  | 3.921984  |
| H  | 1.386097  | -0.064108 | 5.170108  |
| S  | 0.017124  | 1.642844  | 4.155631  |
| N  | -1.279355 | 1.452836  | 0.423289  |
| N  | 0.196866  | 0.088192  | 2.070855  |
| N  | -1.080430 | 1.939549  | 1.662169  |
| C  | 3.791741  | -1.166716 | -2.514439 |

Model II for I.

E= -173810.94654 eV

|    |           |           |           |
|----|-----------|-----------|-----------|
| Cu | 0.023338  | 0.007796  | -0.062713 |
| Cu | 3.833254  | -0.008653 | 0.063678  |
| I  | 2.346641  | 2.177227  | 0.079348  |
| I  | 1.511082  | -2.177695 | -0.076120 |
| C  | -0.316186 | 1.317818  | 2.467095  |
| C  | 1.117282  | -0.348586 | 3.009375  |
| H  | 2.013457  | -0.732341 | 2.528558  |
| H  | 0.575384  | -1.184571 | 3.456748  |
| C  | -2.129815 | 2.378667  | -0.237960 |
| H  | -2.368874 | 2.194502  | -1.272830 |
| C  | -2.534707 | 3.413723  | 0.634689  |
| H  | -3.193469 | 4.234420  | 0.417796  |
| C  | -1.896780 | 3.156582  | 1.817670  |
| H  | -1.885646 | 3.675026  | 2.761090  |
| C  | 1.489112  | 0.721118  | 4.034926  |
| H  | 2.364246  | 1.281073  | 3.709600  |
| H  | 1.646935  | 0.316119  | 5.029807  |
| S  | 0.060008  | 1.865428  | 4.074701  |
| N  | -1.317926 | 1.552857  | 0.380421  |
| N  | 0.245020  | 0.274988  | 2.015169  |
| N  | -1.177502 | 2.021919  | 1.633188  |
| C  | 4.172437  | -1.317512 | -2.467093 |

|    |           |           |           |    |           |           |           |
|----|-----------|-----------|-----------|----|-----------|-----------|-----------|
| C  | 2.549279  | 0.635687  | -3.100338 | C  | 2.738405  | 0.348716  | -3.008558 |
| H  | 1.665860  | 1.089636  | -2.658099 | H  | 1.842007  | 0.731907  | -2.527592 |
| H  | 3.196929  | 1.424803  | -3.489524 | H  | 3.280204  | 1.185060  | -3.455378 |
| C  | 5.418647  | -2.379311 | 0.239953  | C  | 5.986869  | -2.379176 | 0.237184  |
| H  | 5.664725  | -2.201290 | 1.274184  | H  | 6.225960  | -2.195497 | 1.272129  |
| C  | 5.655303  | -3.501974 | -0.585195 | C  | 6.392464  | -3.413271 | -0.636310 |
| H  | 6.163271  | -4.412586 | -0.325827 | H  | 7.051937  | -4.233587 | -0.420132 |
| C  | 5.086951  | -3.187612 | -1.789375 | C  | 5.753968  | -3.155926 | -1.818927 |
| H  | 4.998600  | -3.734081 | -2.712536 | H  | 5.742787  | -3.673883 | -2.762615 |
| C  | 2.153401  | -0.373665 | -4.177864 | C  | 2.367165  | -0.720565 | -4.034774 |
| H  | 1.213983  | -0.859006 | -3.922157 | H  | 1.492459  | -1.281315 | -3.709648 |
| H  | 2.103219  | 0.064142  | -5.170098 | H  | 2.208954  | -0.315095 | -5.029400 |
| S  | 3.471940  | -1.642959 | -4.155538 | S  | 3.796992  | -1.863972 | -4.075285 |
| N  | 4.768217  | -1.453084 | -0.423117 | N  | 5.174291  | -1.553537 | -0.380505 |
| N  | 3.292054  | -0.088393 | -2.070711 | N  | 3.610707  | -0.275215 | -2.014610 |
| N  | 4.569309  | -1.939779 | -1.662012 | N  | 5.033848  | -2.021925 | -1.633522 |
| Cl | -0.793914 | -0.270490 | -2.117705 | Cl | -0.734300 | -0.075165 | -2.193026 |
| Cl | 4.282721  | 0.270202  | 2.117889  | Cl | 4.590398  | 0.072416  | 2.193956  |

Model II for N<sub>3</sub><sup>-</sup>.

E= -166547.89912 eV

|    |           |           |           |
|----|-----------|-----------|-----------|
| Cu | 0.086516  | -0.052197 | 0.242286  |
| Cu | 3.252208  | 0.175086  | 0.145376  |
| C  | -0.551686 | 2.740651  | -0.059065 |
| C  | 0.747418  | 2.760948  | 1.795971  |
| H  | 1.698667  | 2.291923  | 2.035340  |
| H  | 0.107297  | 2.750789  | 2.681862  |
| C  | -1.985880 | 0.445992  | -2.162694 |
| H  | -2.111672 | -0.600416 | -2.388405 |
| C  | -2.455303 | 1.593667  | -2.839311 |
| H  | -3.045155 | 1.631599  | -3.736679 |
| C  | -1.986564 | 2.654373  | -2.112697 |
| H  | -2.063023 | 3.718840  | -2.252628 |
| C  | 0.954883  | 4.175112  | 1.253756  |
| H  | 1.865061  | 4.228775  | 0.659262  |
| H  | 0.954665  | 4.933740  | 2.030382  |
| S  | -0.465607 | 4.468200  | 0.136642  |
| N  | -1.293795 | 0.789131  | -1.100782 |
| N  | 0.077263  | 1.994588  | 0.750674  |
| N  | -1.299843 | 2.136516  | -1.065753 |
| C  | 3.890251  | -2.617552 | 0.443868  |
| C  | 2.576558  | -2.637637 | -1.400720 |
| H  | 1.624229  | -2.167469 | -1.633387 |
| H  | 3.209618  | -2.629601 | -2.291693 |
| C  | 5.341958  | -0.321898 | 2.534796  |

|    |           |           |           |
|----|-----------|-----------|-----------|
| H  | 5.470918  | 0.724665  | 2.758088  |
| C  | 5.811230  | -1.469122 | 3.212059  |
| H  | 6.405077  | -1.506411 | 4.106831  |
| C  | 5.336541  | -2.530379 | 2.489878  |
| H  | 5.410576  | -3.594721 | 2.632108  |
| C  | 2.371106  | -4.050621 | -0.854905 |
| H  | 1.466116  | -4.102175 | -0.252165 |
| H  | 2.362294  | -4.809983 | -1.630716 |
| S  | 3.800634  | -4.345112 | 0.250235  |
| N  | 4.644736  | -0.665602 | 1.476367  |
| N  | 3.256303  | -1.871196 | -0.361724 |
| N  | 4.647062  | -2.013230 | 1.444350  |
| N  | 1.837601  | 0.479636  | -1.260165 |
| N  | 1.504012  | -0.359343 | 1.643134  |
| N  | 1.666842  | 1.554012  | -1.773176 |
| N  | 1.675045  | -1.432364 | 2.158678  |
| N  | 1.458018  | 2.553936  | -2.260091 |
| N  | 1.885355  | -2.430981 | 2.647633  |
| Cl | 3.946885  | 2.308748  | 0.492533  |
| Cl | -0.633197 | -2.181511 | -0.090918 |
